# Supplementary material
Source: ML conference proceedings conference paper supplement (https://openreview.net/forum?id=RCeZ063p33)
Supplement: supplementary_material [file TimePerceiver_Appendices.pdf › TimePerceiver_Appendices.pdf]

---

# TIMEPERCEIVER: An Encoder-Decoder Framework for Generalized Time-Series Forecasting

---

Anonymous Author(s)

Affiliation

Address

email

## Abstract

1 In machine learning, effective modeling requires a holistic consideration of how to  
2 encode inputs, make predictions (*i.e.*, decoding), and train the model. However, in  
3 time-series forecasting, prior work has predominantly focused on encoder design,  
4 often treating prediction and training as separate or secondary concerns. In this  
5 paper, we propose TIMEPERCEIVER, a unified encoder-decoder forecasting frame-  
6 work that is tightly aligned with an effective training strategy. To be specific, we  
7 first *generalize the forecasting task* to include diverse temporal prediction objec-  
8 tives such as extrapolation, interpolation, and imputation. Since this generalization  
9 requires handling input and target segments that are arbitrarily positioned along  
10 the temporal axis, we design a novel encoder-decoder architecture that can flexibly  
11 perceive and adapt to these varying positions. For encoding, we introduce a set of  
12 *latent bottleneck representations* that can interact with all input segments to jointly  
13 capture temporal and cross-channel dependencies. For decoding, we leverage *learn-*  
14 *able queries* corresponding to target timestamps to effectively retrieve relevant  
15 information. Extensive experiments demonstrate that our framework consistently  
16 and significantly outperforms prior state-of-the-art baselines across a wide range  
17 of benchmark datasets.

## 18 1 Introduction

19 *Time-series forecasting* is a fundamental task in machine learning, aiming to predict future events  
20 based on past observations. It is of practical importance, as it plays a crucial role in many real-world  
21 applications, including weather forecasting [1], electricity consumption forecasting [2], and traffic  
22 flow prediction [3]. Despite decades of rapid advances in machine learning, time-series forecasting  
23 remains a challenging problem due to complex temporal dependencies, non-linear patterns, domain  
24 variability, and other factors. In recent years, numerous deep learning approaches [4–18] have been  
25 proposed to improve forecasting accuracy, and it continues to be an active area of research.

26 One promising and popular research direction is to design a new neural network architecture for  
27 time-series data, such as Transformers [4–9], convolutional neural networks (CNNs) [11, 12], multi-  
28 layer perceptrons (MLPs) [13–15], and state space models (SSMs) [17, 18]. These architectures  
29 primarily focus on capturing temporal and channel (*i.e.*, variate) dependencies within input signals,  
30 and how to *encode* the input into a meaningful representation. The encoder architectures are often  
31 categorized into two groups: channel-independent encoders, which treat each variate separately  
32 and apply the same encoder across all variates, and channel-dependent encoders, which explicitly  
33 model interactions among variates. The channel-independent encoders are considered simple yet  
34 robust [19]; however, they fundamentally overlook cross-channel interactions, which can be critical  
35 for multivariate time-series forecasting. In contrast, the channel-dependent encoders [5, 6, 8] can  
36 inherently capture such cross-channel dependencies, but they often suffer from high computational

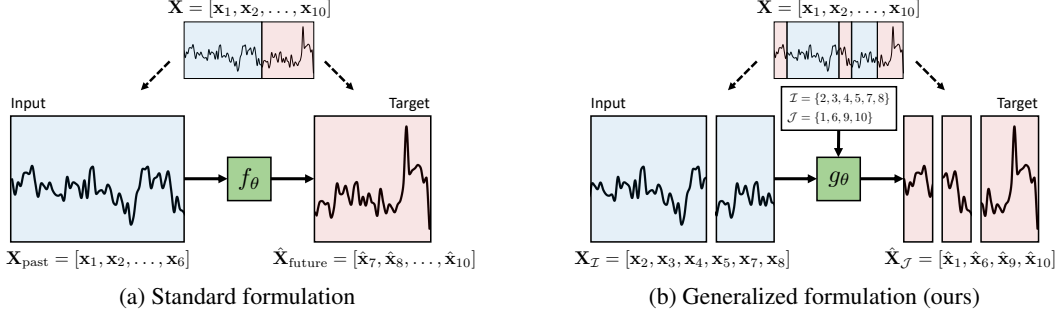

Figure 1: (a) The standard time-series forecasting task aims to predict only the future values from past observations. In contrast, (b) our generalized task formulation aims to predict not only the future, but also the past and missing values based on arbitrary contextual information.

37 cost and do not consistently yield significant improvements in forecasting accuracy over channel-  
 38 independent baselines.

39 While the encoder architecture is undoubtedly a core component of time-series forecasting models,  
 40 it is equally important to consider (i) how to accurately predict (*i.e.*, *decode*) future signals from  
 41 the encoded representations of past signals, and (ii) how to effectively *train* the entire forecasting  
 42 model. However, they often been studied independently, and little attention has been paid to how  
 43 to effectively integrate them. For decoding, most prior works rely on a simple linear projection that  
 44 directly predicts the future from the encoded representations. This design offers advantages in terms  
 45 of simplicity and training efficiency, but may struggle to fully capture complex temporal structures.  
 46 For training, inspired by BERT [20], masking-and-reconstruction tasks [4, 16] have been commonly  
 47 adopted to pretrain encoders before supervised learning for time-series forecasting. In the pretraining  
 48 stage, a subset of temporal segments from the time-series data is masked, and the encoder learns to  
 49 reconstruct the masked portions. Despite its effectiveness, the self-supervised learning approach and  
 50 the two-stage training (*i.e.*, pretraining-finetuning) strategy remain questionable whether it is truly  
 51 aligned with architectural designs (*i.e.*, encoders and decoders) of time-series forecasting models.

52 **Contribution.** In this paper, we propose TIMEPERCEIVER, a unified framework that tightly integrates  
 53 an encoder-decoder architecture with an effective training strategy tailored for time-series forecasting.  
 54 Our key idea is to generalize the standard forecasting task—formulated as predicting future values  
 55 from a sequence of past observations—into a broader formulation that encompasses extrapolation,  
 56 interpolation, and imputation tasks along the temporal axis (see Figure 1). In this setting, the model  
 57 learns to predict not only future values, but also past and missing values based on arbitrary contextual  
 58 information. This generalized formulation enables the model to jointly learn temporal structures and  
 59 predictive behavior in a single end-to-end training process, thereby fostering a deeper understanding  
 60 of temporal dynamics and eliminating the need for a separate pretraining-finetuning pipeline.

61 To support our formulation, as illustrated in Figure 2, we design a novel attention-based encoder-  
 62 decoder architecture that can flexibly handle arbitrary and potentially discontinuous temporal seg-  
 63 ments unlike conventional models that operate on fixed-length lookback windows and predict fixed-  
 64 length forecasting horizons. Specifically, our encoder utilizes the cross-attention mechanism (i) to  
 65 encode an arbitrary set of temporal segments into a fixed-size set of *latent bottleneck representations*,  
 66 and (ii) to contextualize each segment by leveraging the bottleneck representations. This bottleneck  
 67 process enables the encoder to efficiently capture both temporal and cross-channel dependencies. To  
 68 enhance the quality of the bottleneck representations, we also apply the self-attention mechanism  
 69 within the bottleneck set. After encoding input segments, our decoder generates predictions via cross-  
 70 attention between the representations of the input segments and learnable queries that correspond to  
 71 target timestamps. This allows the decoder to selectively retrieve relevant information of the input  
 72 and to produce temporally-aware outputs. This design is naturally aligned with our learning objective,  
 73 which includes the forecasting task as part of a broader set of temporal prediction tasks.

74 Through extensive experiments, our framework achieves state-of-the-art performance compared to  
 75 recent baselines [4, 6–9, 11, 13, 14, 17] on standard benchmarks [1–3, 21, 22] (see Table 1). Notably,  
 76 our model achieves **55** best and **17** second-best scores out of 80 settings, which are averaged over  
 77 three different input lengths, demonstrating its strong overall performance. As a result, our framework  
 78 records the best average rank with **1.375** in MSE and **1.550**, indicating its consistent superiority

over the baselines. We also conduct ablation studies to verify the effectiveness of each component (Section 4.2) and analyze attention maps to gain insights into how the model operates (Section 4.3). Overall, our work emphasizes the importance of aligning architectural design with task formulation in time-series forecasting. We hope that this perspective encourages a shift from encoder-centric designs toward unified approaches more closely aligned with the core objectives of time-series forecasting.

## 2 Preliminaries

### 2.1 Problem Statement: Multivariate Time-Series Forecasting

In this paper, we aim to solve the task of *multivariate time-series forecasting*, which requires to predict future values of multiple variables based on past observations. To formally define the task, let  $\mathbf{x}_t \in \mathbb{R}^C$  denote a multivariate observation at time step  $t$ , where  $C$  is the number of variables (or channels). A multivariate time series of length  $T$  can be written as a sequence  $\mathbf{X} = [\mathbf{x}_1, \mathbf{x}_2, \dots, \mathbf{x}_T] \in \mathbb{R}^{C \times T}$ . Given a lookback window  $\mathbf{X}_{\text{past}} = [\mathbf{x}_{t-L+1}, \dots, \mathbf{x}_t]$  of length  $L$ , the goal of the task is to predict the future values  $\mathbf{X}_{\text{future}} = [\mathbf{x}_{t+1}, \dots, \mathbf{x}_{t+H}]$  over a forecasting horizon of length  $H$ .

Solving the task requires effectively capturing key characteristics of time-series data, such as temporal dependencies and cross-variable interactions. A common approach is to design a forecasting architecture  $f_\theta$  that can model such properties, and to train it using a simple objective such as mean squared error between the predicted and ground-truth future values as follows (see Figure 1a):

$$\mathcal{L}(\theta; \mathbf{X}_{\text{past}}, \mathbf{X}_{\text{future}}) = \frac{1}{HC} \sum_{h=1}^H \|\hat{\mathbf{x}}_{t+h} - \mathbf{x}_{t+h}\|_2^2, \quad \hat{\mathbf{X}}_{\text{future}} = [\hat{\mathbf{x}}_{t+1}, \dots, \hat{\mathbf{x}}_{t+H}] = f_\theta(\mathbf{X}_{\text{past}}). \quad (1)$$

This standard formulation, commonly used in many forecasting models and benchmarks [4, 6, 8, 22], assumes that both the lookback window and the forecasting horizon are of fixed length and continuous.

### 2.2 Attention Mechanism

In this section, we formally describe the attention mechanism [23], which plays an important role in our TIMEPERCEIVER framework. It is designed to dynamically capture dependencies between input tokens by computing their contextual relevance through learned similarity scores. Specifically, given queries  $\mathbf{Q} \in \mathbb{R}^{N \times d}$ , keys  $\mathbf{K} \in \mathbb{R}^{M \times d}$ , and values  $\mathbf{V} \in \mathbb{R}^{M \times d}$ , the attention output is computed as:

$$\text{Attention}(\mathbf{Q}, \mathbf{K}, \mathbf{V}) = \text{Softmax}\left(\frac{\mathbf{Q}\mathbf{K}^\top}{\sqrt{d}}\right) \mathbf{V}. \quad (2)$$

This has recently become a standard architectural component across various domains, including NLP [23], vision [24], tabular data [23], and time-series forecasting [4–7]. A common design for modular blocks combines attention with skip connections and feedforward networks (FFNs):

$$\mathbf{H} = \mathbf{U} + \text{Attention}(\mathbf{U}, \mathbf{Z}, \mathbf{Z}), \quad (3)$$

$$\text{AttnBlock}(\mathbf{U}, \mathbf{Z}) = \mathbf{H} + \text{FFN}(\mathbf{H}), \quad (4)$$

where  $\mathbf{U} \in \mathbb{R}^{N \times d}$  and  $\mathbf{Z} \in \mathbb{R}^{M \times d}$  denote input and context tokens, respectively. For simplicity, we omit learnable parameters, layer normalization [25], and multi-head attention [23]. When  $\mathbf{U} = \mathbf{Z}$ , the block corresponds to self-attention; otherwise, it performs cross-attention, allowing input tokens to attend to an external context.

In the context of time-series forecasting, attention-based models adopt various tokenization strategies to capture temporal and multivariate patterns. A common approach is to divide the input time series into contiguous fixed-length temporal segments, or patches, and treat each patch as a token [4, 5]. Alternatively, DeformableTST [7] selectively samples important time steps and treats them as tokens to capture temporal patterns, while iTransformer [6] represents the entire time series of each channel as a single token. In this work, we simply adopt the common approach.

## 3 Methodology

In this work, we propose TIMEPERCEIVER, a unified encoder-decoder framework for generalized time-series forecasting. Our framework is based on a generalized formulation of the forecasting task

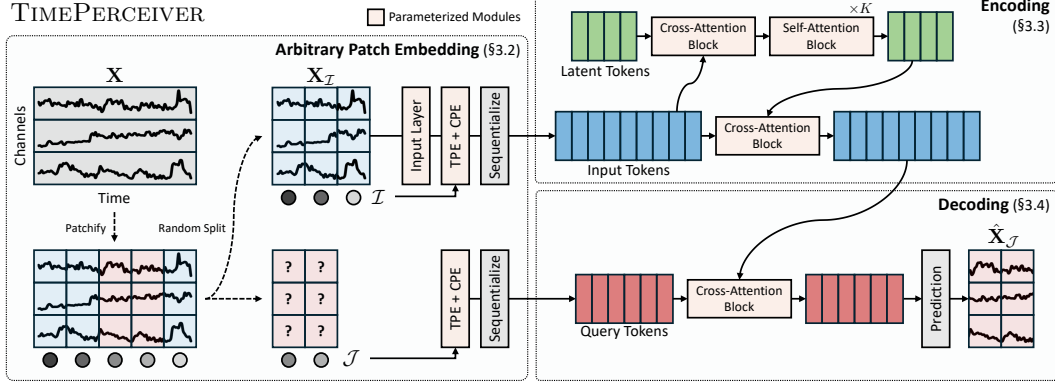

Figure 2: An overview of our TIMEPERCEIVER framework.

(Section 3.1 and 3.2) and consists of two main components tailored to the formulation: an encoder that jointly captures complex temporal and channel dependencies (Section 3.3), and a decoder that selects queries corresponding to target segments and retrieves the relevant context (Section 3.4). Our overall framework is illustrated in Figure 2.

### 3.1 A Generalized Formulation of Time-series Forecasting

While the formulation described in Section 2.1 explicitly follows the forecasting task definition, it inherently assumes a unidirectional temporal flow (*i.e.*, from past to future), which may limit the ability to fully capture the underlying temporal dynamics. To address this limitation, we propose a *generalized formulation* that extends the forecasting task to allow flexible conditioning on arbitrary temporal segments, enabling the model to learn a more comprehensive understanding of the temporal dynamics. To define our generalized formulation, we begin by introducing a notation for a time series of arbitrary temporal segments. Given a multivariate time series  $\mathbf{X} = [\mathbf{x}_1, \mathbf{x}_2, \dots, \mathbf{x}_T]$  and a set of time indices  $\mathcal{I} = \{i_1, i_2, \dots, i_{|\mathcal{I}|}\} \subseteq \{1, \dots, T\}$ , we define the corresponding series  $\mathbf{X}_{\mathcal{I}}$  as follows:

$$\mathbf{X}_{\mathcal{I}} := [\mathbf{x}_i : i \in \mathcal{I}] = [\mathbf{x}_{i_1}, \dots, \mathbf{x}_{i_{|\mathcal{I}|}}] \in \mathbb{R}^{C \times |\mathcal{I}|}. \quad (5)$$

Now, the generalized forecasting task can be defined by specifying a subset of time indices  $\mathcal{I}$  as the input context and treating the remaining indices  $\mathcal{J} = \{1, \dots, T\} \setminus \mathcal{I}$  as prediction targets. In this task, a generalized forecasting model  $g_{\theta}$  is expected to operate on any choice of  $\mathcal{I}$  and  $\mathcal{J}$ , and to predict the values of the target indices as follows (see Figure 1b):

$$\hat{\mathbf{X}}_{\mathcal{J}} = g_{\theta}(\mathbf{X}_{\mathcal{I}}, \mathcal{I}, \mathcal{J}). \quad (6)$$

The model is trained to minimize the mean squared error over the target indices  $\mathcal{J}$ , formulated as:

$$\mathcal{L}(\theta; \mathbf{X}, \mathcal{I}, \mathcal{J}) = \frac{1}{|\mathcal{J}|C} \sum_{j \in \mathcal{J}} \|\hat{\mathbf{x}}_j - \mathbf{x}_j\|_2^2, \quad \hat{\mathbf{X}}_{\mathcal{J}} = [\hat{\mathbf{x}}_j : j \in \mathcal{J}] = g_{\theta}(\mathbf{X}_{\mathcal{I}}, \mathcal{I}, \mathcal{J}). \quad (7)$$

This generalized formulation allows both the input and target time indices to be arbitrary and non-contiguous, thereby encompassing extrapolation, interpolation, and imputation tasks and capturing more complex temporal patterns. For example, the standard model  $f_{\theta}$  can be seen as its special case:

$$f_{\theta}(\mathbf{X}_{\text{past}}) = g_{\theta}(\mathbf{X}_{\text{past}}, \{t - L + 1, \dots, t\}, \{t + 1, \dots, t + H\}). \quad (8)$$

### 3.2 Constructing Arbitrary Patch Embeddings

Leveraging patch-based representations has recently become an important design choice in time-series forecasting models [4] inspired by the success of the Vision Transformer [24]. Motivated by this trend, we extend our formulation in Section 3.1 to its patch-based version. To this end, given a multivariate time series  $\mathbf{X} \in \mathbb{R}^{C \times T}$ , we first divide the time index set  $\{1, 2, \dots, T\}$  into  $N$  disjoint subsets  $\mathcal{P}_1, \mathcal{P}_2, \dots, \mathcal{P}_N$  where  $\mathcal{P}_i = \{(i-1)P + 1, \dots, iP\}$  and  $P = T/N$  is the patch length. Here, we assume  $T$  is divisible by  $N$  for notational simplicity. This results in  $N$  fixed-length and non-overlapping *patches* along the temporal axis, denoted as  $\mathbf{X}_{\mathcal{P}_1}, \dots, \mathbf{X}_{\mathcal{P}_N}$ , where each patch is defined

149 as  $\mathbf{X}_{\mathcal{P}_i} = [\mathbf{x}_t \in \mathbb{R}^C : t \in \mathcal{P}_i] \in \mathbb{R}^{C \times P}$ . For our task formulation, we consider an arbitrary set of  
 150 patch indices  $\mathcal{I}_{\text{patch}} \subset \{1, 2, \dots, N\}$  and define the remaining set as  $\mathcal{J}_{\text{patch}} = \{1, \dots, N\} \setminus \mathcal{I}_{\text{patch}}$ .  
 151 This corresponds to selecting input and target time indices as  $\mathcal{I} = \bigcup_{i \in \mathcal{I}_{\text{patch}}} \mathcal{P}_i$  and  $\mathcal{J} = \bigcup_{j \in \mathcal{J}_{\text{patch}}} \mathcal{P}_j$ ,  
 152 respectively. Given the lookback window length  $L$  in the forecasting task, we set the number of  
 153 selected input patches as  $|\mathcal{I}_{\text{patch}}| = L/P$ , i.e.,  $|\mathcal{I}| = L$ .

154 To encode the structural information of patches  $\mathbf{X}_{\mathcal{P}_1}, \dots, \mathbf{X}_{\mathcal{P}_N}$ , we introduce two learnable positional  
 155 embeddings: (i) temporal positional embedding (TPE), denoted as  $\mathbf{E}^{\text{temporal}} \in \mathbb{R}^{N \times D}$ , which encodes  
 156 the temporal location of each patch, and (ii) channel positional embedding (CPE), denoted as  
 157  $\mathbf{E}^{\text{channel}} \in \mathbb{R}^{C \times D}$ , which represents the identity of each channel. Using these positional embeddings,  
 158 we construct the input patch embedding  $\mathbf{H}^{(0)}$  and the query patch embedding  $\mathbf{Q}^{(0)}$  as follows:

$$\mathbf{H}_{c,i}^{(0)} = \mathbf{X}_{\mathcal{P}_i,c} \mathbf{W}_{\text{input}} + \mathbf{E}_c^{\text{channel}} + \mathbf{E}_i^{\text{temporal}} \in \mathbb{R}^D, \quad \forall i \in \mathcal{I}_{\text{patch}}, \forall c \in \{1, \dots, C\}, \quad (9)$$

$$\mathbf{Q}_{c,j}^{(0)} = \mathbf{E}_c^{\text{channel}} + \mathbf{E}_j^{\text{temporal}} \in \mathbb{R}^D, \quad \forall j \in \mathcal{J}_{\text{patch}}, \forall c \in \{1, \dots, C\}, \quad (10)$$

159 where  $\mathbf{X}_{\mathcal{P}_i,c} \in \mathbb{R}^P$  denotes the raw values of the  $i$ -th patch for channel  $c$ , and  $\mathbf{W}_{\text{input}} \in \mathbb{R}^{P \times D}$  is a  
 160 learnable input projection matrix. Note that  $\mathbf{H}^{(0)}$  and  $\mathbf{Q}^{(0)}$  are treated as sequences of embedding  
 161 vectors in Section 3.3 and 3.4, i.e.,  $\mathbf{H}^{(0)} \in \mathbb{R}^{(C|\mathcal{I}_{\text{patch}}|) \times D}$  and  $\mathbf{Q}^{(0)} \in \mathbb{R}^{(C|\mathcal{J}_{\text{patch}}|) \times D}$ .

### 162 3.3 Encoding with Latent Bottleneck

163 Given the input patch embeddings  $\mathbf{H}^{(0)}$  constructed in Section 3.2, our encoder aims to efficiently  
 164 capture both temporal and cross-channel dependencies within the embeddings for time-series fore-  
 165 casting. To this end, we propose *latent bottleneck*, a two-stage mechanism in which input tokens are  
 166 first compressed into a fixed number of latent tokens and then projected back to the input tokens. This  
 167 design enables efficient and selective modeling of key dependencies while avoiding the computational  
 168 overhead of full attention.

169 We now formally describe our attention-based encoder based on the latent bottleneck mechanism.  
 170 To this end, we introduce a set of learnable latent tokens  $\mathbf{Z}^{(0)} \in \mathbb{R}^{M \times D}$  where  $M$  is the number of  
 171 latent tokens. Since these tokens can adaptively model key dependencies,  $M$  can be significantly  
 172 smaller than the number of input tokens  $C|\mathcal{I}_{\text{patch}}|$ . In our experiments,  $M \in \{8, 16, 32\}$  is sufficient  
 173 to achieve state-of-the-art performance. Starting from  $\mathbf{Z}^{(0)}$ , the latent bottleneck operates as follows:

- 174 1. The latent tokens attend to the input to collect contextual information:

$$\mathbf{Z}^{(1)} = \text{AttnBlock}(\mathbf{Z}^{(0)}, \mathbf{H}^{(0)}, \mathbf{H}^{(0)}) \in \mathbb{R}^{M \times D}.$$

- 175 2. The latent tokens are refined via  $K$  self-attention layers:

$$\mathbf{Z}^{(k+1)} = \text{AttnBlock}(\mathbf{Z}^{(k)}, \mathbf{Z}^{(k)}, \mathbf{Z}^{(k)}), \quad \forall k = 1, \dots, K.$$

- 176 3. The updated latent tokens are used to update the input tokens:

$$\mathbf{H}^{(1)} = \text{AttnBlock}(\mathbf{H}^{(0)}, \mathbf{Z}^{(K+1)}, \mathbf{Z}^{(K+1)}) \in \mathbb{R}^{(C|\mathcal{I}_{\text{patch}}|) \times D}.$$

177 This design acts as an efficient attention bottleneck that significantly reduces computation from  
 178  $\mathcal{O}(N^2)$  in full attention to  $\mathcal{O}(NM)$  while selectively preserving informative patterns across both  
 179 temporal and channel dimensions. We compare our encoding mechanism with full and axis-specific  
 180 attention schemes in Table 2.

### 181 3.4 Decoding via Querying Target Patches

182 Based on the query patch embeddings  $\mathbf{Q}^{(0)}$  described in Section 3.2 and the encoded input patch  
 183 embeddings  $\mathbf{H}^{(1)}$  from Section 3.3, our decoder is designed to generate predictions  $\hat{\mathbf{X}}_{\mathcal{P}_j}$  for target  
 184 patches  $\mathcal{P}_j$ , where  $j \in \mathcal{J}_{\text{patch}}$ . Note that  $\mathbf{Q}^{(0)} \in \mathbb{R}^{(C|\mathcal{J}_{\text{patch}}|) \times D}$  consists of  $C \times |\mathcal{J}_{\text{patch}}|$  query tokens  
 185 where each token  $\mathbf{Q}_{c,j}^{(0)} = \mathbf{E}_c^{\text{channel}} + \mathbf{E}_j^{\text{temporal}} \in \mathbb{R}^D$  corresponds to the query vector for channel  $c$  and  
 186 patch  $\mathcal{P}_j$ , as defined in Section 3.2.

187 To retrieve relevant information from the input for each query, we apply cross-attention using  $\mathbf{Q}^{(0)}$  as  
 188 queries and  $\mathbf{H}^{(1)}$  as keys and values:

$$\mathbf{Q}^{(1)} = \text{AttnBlock}(\mathbf{Q}^{(0)}, \mathbf{H}^{(1)}, \mathbf{H}^{(1)}) \in \mathbb{R}^{(C|\mathcal{J}_{\text{patch}}|) \times D}.$$

Table 1: Multivariate long-term forecasting results compared with baseline models. **Bold** indicates the best result, and underlined denotes the second best. The results are averaged over input lengths  $L \in \{96, 384, 768\}$  and prediction lengths  $H \in \{96, 192, 336, 720\}$ . Rank indicates the average position of each model in MSE and MAE across all prediction lengths. Results for each individual input length are provided in Appendix C.

| Models      | TimePerceiver |              | DeformableTST |              | CARD         |              | CATS         |       | PatchTST     |              | iTransformer |              | S-Mamba |       | DLinear      |              | TimesNet |       | TiDE  |       |       |       |
|-------------|---------------|--------------|---------------|--------------|--------------|--------------|--------------|-------|--------------|--------------|--------------|--------------|---------|-------|--------------|--------------|----------|-------|-------|-------|-------|-------|
| Metric      | MSE           | MAE          | MSE           | MAE          | MSE          | MAE          | MSE          | MAE   | MSE          | MAE          | MSE          | MAE          | MSE     | MAE   | MSE          | MAE          | MSE      | MAE   | MSE   | MAE   |       |       |
| Weather     | 96            | <b>0.147</b> | <b>0.199</b>  | 0.155        | 0.203        | 0.156        | 0.208        |       | <u>0.150</u> | <u>0.201</u> | 0.158        | 0.207        | 0.166   | 0.214 | 0.162        | 0.212        | 0.178    | 0.238 | 0.169 | 0.221 | 0.183 | 0.238 |
|             | 192           | <b>0.193</b> | <b>0.242</b>  | 0.200        | <u>0.244</u> | 0.214        | 0.258        |       | <u>0.196</u> | <u>0.244</u> | 0.204        | 0.248        | 0.210   | 0.253 | 0.209        | 0.254        | 0.221    | 0.278 | 0.237 | 0.278 | 0.225 | 0.274 |
|             | 336           | <b>0.246</b> | <b>0.283</b>  | 0.252        | <u>0.284</u> | 0.263        | 0.295        |       | <u>0.249</u> | <u>0.284</u> | 0.255        | 0.286        | 0.263   | 0.293 | 0.266        | 0.296        | 0.268    | 0.319 | 0.292 | 0.319 | 0.270 | 0.309 |
|             | 720           | <u>0.323</u> | 0.338         | 0.325        | <b>0.335</b> | 0.354        | 0.351        |       | <b>0.322</b> | <b>0.335</b> | 0.328        | <u>0.336</u> | 0.335   | 0.343 | 0.334        | 0.342        | 0.328    | 0.366 | 0.385 | 0.377 | 0.335 | 0.357 |
|             | Avg           | <b>0.227</b> | <b>0.265</b>  | 0.233        | <u>0.266</u> | 0.247        | 0.278        |       | <u>0.229</u> | <u>0.266</u> | 0.236        | 0.269        | 0.244   | 0.276 | 0.243        | 0.276        | 0.249    | 0.300 | 0.271 | 0.299 | 0.254 | 0.295 |
| Solar       | 96            | <b>0.173</b> | <b>0.221</b>  | <u>0.177</u> | 0.237        | 0.194        | 0.257        |       | 0.184        | <u>0.228</u> | 0.207        | 0.283        | 0.188   | 0.242 | 0.191        | 0.242        | 0.232    | 0.322 | 0.229 | 0.294 | 0.246 | 0.324 |
|             | 192           | <b>0.195</b> | <b>0.238</b>  | <u>0.199</u> | 0.254        | 0.229        | 0.279        |       | 0.210        | <u>0.243</u> | 0.231        | 0.304        | 0.212   | 0.263 | 0.219        | 0.268        | 0.258    | 0.341 | 0.266 | 0.318 | 0.271 | 0.351 |
|             | 336           | <b>0.206</b> | <b>0.248</b>  | <u>0.208</u> | 0.263        | 0.239        | 0.289        |       | 0.218        | <u>0.253</u> | 0.249        | 0.312        | 0.226   | 0.275 | 0.229        | 0.279        | 0.280    | 0.355 | 0.275 | 0.337 | 0.291 | 0.367 |
|             | 720           | <u>0.217</u> | <b>0.259</b>  | <u>0.214</u> | 0.266        | 0.251        | 0.301        |       | 0.233        | <u>0.261</u> | 0.250        | 0.314        | 0.232   | 0.282 | 0.236        | 0.284        | 0.291    | 0.360 | 0.276 | 0.329 | 0.300 | 0.364 |
|             | Avg           | <b>0.198</b> | <b>0.241</b>  | <u>0.199</u> | 0.255        | 0.228        | 0.282        |       | 0.211        | <u>0.247</u> | 0.234        | 0.303        | 0.214   | 0.266 | 0.219        | 0.268        | 0.266    | 0.345 | 0.261 | 0.319 | 0.277 | 0.351 |
| Electricity | 96            | <b>0.128</b> | <b>0.223</b>  | 0.141        | 0.240        | 0.140        | 0.236        |       | <u>0.134</u> | <u>0.228</u> | 0.148        | 0.246        | 0.143   | 0.240 | 0.136        | 0.232        | 0.164    | 0.258 | 0.188 | 0.294 | 0.180 | 0.282 |
|             | 192           | <b>0.146</b> | <b>0.240</b>  | 0.155        | 0.254        | 0.161        | 0.257        |       | <u>0.153</u> | <u>0.243</u> | 0.163        | 0.256        | 0.160   | 0.256 | 0.157        | 0.253        | 0.173    | 0.268 | 0.197 | 0.303 | 0.186 | 0.287 |
|             | 336           | <b>0.165</b> | <b>0.259</b>  | 0.172        | 0.271        | 0.181        | 0.279        |       | <u>0.171</u> | <u>0.262</u> | 0.180        | 0.276        | 0.177   | 0.274 | 0.173        | 0.270        | 0.188    | 0.285 | 0.229 | 0.327 | 0.202 | 0.301 |
|             | 720           | <u>0.204</u> | <u>0.293</u>  | 0.208        | 0.303        | 0.212        | 0.304        |       | <u>0.204</u> | <u>0.292</u> | 0.218        | 0.306        | 0.220   | 0.313 | <b>0.198</b> | <u>0.293</u> | 0.223    | 0.318 | 0.239 | 0.337 | 0.236 | 0.328 |
|             | Avg           | <b>0.161</b> | <b>0.254</b>  | 0.169        | 0.267        | 0.174        | 0.269        |       | <u>0.166</u> | <u>0.257</u> | 0.177        | 0.271        | 0.175   | 0.271 | <u>0.166</u> | 0.262        | 0.187    | 0.282 | 0.213 | 0.315 | 0.201 | 0.300 |
| Traffic     | 96            | 0.381        | 0.263         | <u>0.378</u> | 0.265        | 0.399        | 0.279        |       | 0.379        | <u>0.255</u> | 0.407        | 0.280        | 0.389   | 0.286 | <b>0.357</b> | <b>0.254</b> | 0.493    | 0.329 | 0.571 | 0.310 | 0.582 | 0.400 |
|             | 192           | <u>0.394</u> | <u>0.265</u>  | <u>0.401</u> | 0.272        | 0.415        | 0.283        |       | 0.400        | 0.266        | 0.417        | 0.283        | 0.410   | 0.298 | <b>0.371</b> | <b>0.262</b> | 0.482    | 0.323 | 0.584 | 0.316 | 0.569 | 0.397 |
|             | 336           | <u>0.409</u> | 0.273         | 0.413        | 0.282        | 0.429        | 0.293        |       | 0.413        | <u>0.271</u> | 0.430        | 0.289        | 0.428   | 0.307 | <b>0.382</b> | <b>0.270</b> | 0.493    | 0.328 | 0.597 | 0.317 | 0.581 | 0.404 |
|             | 720           | <u>0.445</u> | <b>0.293</b>  | 0.448        | 0.300        | 0.461        | 0.308        |       | 0.448        | <u>0.294</u> | 0.465        | 0.307        | 0.468   | 0.331 | <b>0.438</b> | 0.295        | 0.530    | 0.350 | 0.619 | 0.330 | 0.583 | 0.405 |
|             | Avg           | <u>0.407</u> | 0.273         | 0.410        | 0.280        | 0.426        | 0.291        |       | 0.411        | <u>0.272</u> | 0.430        | 0.290        | 0.424   | 0.306 | <b>0.387</b> | <b>0.270</b> | 0.499    | 0.333 | 0.593 | 0.318 | 0.579 | 0.401 |
| ETTm1       | 96            | <b>0.364</b> | <b>0.392</b>  | <u>0.370</u> | <u>0.399</u> | 0.384        | 0.406        |       | 0.375        | 0.402        | 0.390        | 0.410        | 0.400   | 0.420 | 0.392        | 0.416        | 0.377    | 0.400 | 0.436 | 0.438 | 0.459 | 0.459 |
|             | 192           | <b>0.402</b> | <b>0.417</b>  | <u>0.415</u> | <u>0.425</u> | 0.421        | 0.426        |       | 0.419        | 0.432        | 0.429        | 0.433        | 0.441   | 0.446 | 0.437        | 0.444        | 0.418    | 0.426 | 0.481 | 0.467 | 0.497 | 0.481 |
|             | 336           | <u>0.425</u> | <u>0.431</u>  | <u>0.411</u> | <u>0.426</u> | 0.451        | 0.445        |       | 0.443        | 0.445        | 0.458        | 0.452        | 0.472   | 0.466 | 0.470        | 0.467        | 0.481    | 0.451 | 0.561 | 0.503 | 0.525 | 0.499 |
|             | 720           | <b>0.450</b> | <b>0.461</b>  | <u>0.456</u> | <u>0.469</u> | 0.463        | 0.473        |       | 0.476        | 0.470        | 0.473        | 0.481        | 0.533   | 0.520 | 0.514        | 0.508        | 0.495    | 0.508 | 0.615 | 0.533 | 0.541 | 0.529 |
|             | Avg           | <b>0.410</b> | <b>0.426</b>  | <u>0.413</u> | <u>0.430</u> | 0.430        | 0.438        |       | 0.428        | 0.438        | 0.438        | 0.444        | 0.461   | 0.463 | 0.445        | 0.459        | 0.436    | 0.447 | 0.524 | 0.485 | 0.505 | 0.492 |
| ETTm2       | 96            | <u>0.278</u> | <u>0.336</u>  | <b>0.274</b> | <b>0.334</b> | 0.283        | 0.339        |       | 0.282        | 0.342        | 0.284        | 0.341        | 0.303   | 0.346 | 0.298        | 0.354        | 0.321    | 0.380 | 0.373 | 0.405 | 0.378 | 0.433 |
|             | 192           | <u>0.347</u> | 0.388         | <b>0.334</b> | <b>0.374</b> | 0.355        | <u>0.384</u> |       | 0.348        | 0.385        | 0.354        | <u>0.384</u> | 0.396   | 0.415 | 0.371        | 0.400        | 0.436    | 0.451 | 0.416 | 0.438 | 0.468 | 0.485 |
|             | 336           | <u>0.354</u> | 0.407         | <u>0.328</u> | <u>0.377</u> | 0.382        | 0.409        |       | 0.372        | <u>0.405</u> | 0.378        | 0.408        | 0.427   | 0.438 | 0.403        | 0.425        | 0.533    | 0.508 | 0.469 | 0.469 | 0.524 | 0.522 |
|             | 720           | <b>0.395</b> | <u>0.437</u>  | 0.406        | <u>0.437</u> | <u>0.401</u> | <b>0.431</b> |       | 0.418        | 0.448        | 0.409        | 0.439        | 0.432   | 0.454 | 0.423        | 0.448        | 0.847    | 0.656 | 0.484 | 0.482 | 0.624 | 0.579 |
|             | Avg           | <u>0.344</u> | 0.392         | <b>0.336</b> | <b>0.381</b> | 0.355        | <u>0.391</u> |       | 0.355        | 0.395        | 0.356        | 0.394        | 0.390   | 0.417 | 0.374        | 0.407        | 0.535    | 0.499 | 0.436 | 0.450 | 0.499 | 0.505 |
| ETTm1       | 96            | <b>0.291</b> | <b>0.339</b>  | 0.300        | 0.350        | 0.306        | 0.349        |       | <u>0.296</u> | <u>0.342</u> | 0.305        | 0.354        | 0.321   | 0.368 | 0.317        | 0.365        | 0.318    | 0.356 | 0.351 | 0.383 | 0.331 | 0.367 |
|             | 192           | <b>0.329</b> | <b>0.365</b>  | 0.338        | 0.374        | 0.350        | 0.374        |       | <u>0.333</u> | <u>0.369</u> | 0.345        | 0.377        | 0.359   | 0.389 | 0.357        | 0.387        | 0.351    | 0.375 | 0.384 | 0.396 | 0.362 | 0.383 |
|             | 336           | <b>0.357</b> | <b>0.383</b>  | 0.368        | 0.396        | 0.381        | 0.394        |       | <u>0.365</u> | <u>0.393</u> | 0.377        | 0.400        | 0.399   | 0.412 | 0.388        | 0.407        | 0.382    | 0.394 | 0.414 | 0.415 | 0.393 | 0.402 |
|             | 720           | <b>0.412</b> | <b>0.415</b>  | 0.426        | 0.426        | 0.435        | <u>0.424</u> |       | <u>0.421</u> | <u>0.424</u> | 0.432        | 0.433        | 0.463   | 0.450 | 0.448        | 0.443        | 0.436    | 0.428 | 0.501 | 0.463 | 0.447 | 0.434 |
|             | Avg           | <b>0.347</b> | <b>0.375</b>  | 0.358        | 0.386        | 0.368        | 0.386        |       | <u>0.354</u> | <u>0.382</u> | 0.365        | 0.391        | 0.386   | 0.405 | 0.377        | 0.401        | 0.372    | 0.388 | 0.412 | 0.414 | 0.383 | 0.397 |
| ETTm2       | 96            | <b>0.166</b> | <b>0.254</b>  | 0.172        | 0.259        | <u>0.168</u> | <u>0.257</u> |       | 0.173        | 0.261        | 0.174        | 0.262        | 0.181   | 0.271 | 0.179        | 0.268        | 0.173    | 0.268 | 0.216 | 0.290 | 0.194 | 0.296 |
|             | 192           | <b>0.225</b> | <b>0.290</b>  | <u>0.233</u> | <u>0.298</u> | 0.234        | 0.301        |       | 0.237        | 0.307        | 0.239        | 0.305        | 0.244   | 0.313 | 0.239        | 0.309        | 0.248    | 0.328 | 0.262 | 0.323 | 0.262 | 0.343 |
|             | 336           | <b>0.283</b> | <b>0.327</b>  | 0.289        | 0.336        | <b>0.283</b> | <u>0.333</u> |       | <u>0.288</u> | 0.339        | 0.296        | 0.343        | 0.301   | 0.349 | 0.294        | 0.345        | 0.325    | 0.386 | 0.320 | 0.360 | 0.330 | 0.389 |
|             | 720           | <b>0.371</b> | <b>0.384</b>  | 0.371        | <u>0.389</u> | 0.386        | 0.395        |       | <u>0.377</u> | 0.395        | 0.382        | 0.396        | 0.397   | 0.407 | 0.380        | 0.396        | 0.453    | 0.457 | 0.446 | 0.431 | 0.454 | 0.463 |
|             | Avg           | <b>0.261</b> | <b>0.314</b>  | <u>0.267</u> | <u>0.321</u> | 0.268        | <u>0.321</u> |       | 0.269        | 0.326        | 0.273        | 0.327        | 0.281   | 0.335 | 0.273        | 0.330        | 0.300    | 0.360 | 0.311 | 0.351 | 0.310 | 0.373 |
| Rank        | <b>1.375</b>  | <b>1.550</b> | <u>2.525</u>  | 2.800        | 4.975        | 4.375        |              | 2.850 | <u>2.700</u> | 5.450        | 5.225        | 6.475        | 6.650   | 4.950 | 5.175        | 7.575        | 7.750    | 9.300 | 8.825 | 9.175 | 9.225 |       |

Final predictions for each channel and patch are then computed via a learnable linear projection:

$$\forall c \in \{1, \dots, C\}, \forall j \in \mathcal{J}_{\text{patch}}, \hat{\mathbf{X}}_{\mathcal{P}_j, c} = \mathbf{Q}_{c, j}^{(1)} \mathbf{W}_{\text{output}} \in \mathbb{R}^P, \quad \text{where } \mathbf{W}_{\text{output}} \in \mathbb{R}^{D \times P}.$$

This query-driven decoding mechanism allows the model to selectively retrieve and reconstruct the missing target patches based on their positional embeddings and contextualized encoder outputs. By actively learning to infer meaningful patterns from diverse and dynamically sampled input contexts, this decoder design enhances the model's ability to capture temporal structure and inter-channel dependencies without relying on explicit supervision. This decoding strategy is a key component of our generalized forecasting formulation.

## 4 Experiments

We design our experiments to investigate the following:

- Does our framework consistently outperform baselines across diverse benchmarks? (§4.1)
- How does each component of our framework contribute to overall performance? (§4.2)
- How does our attention behave in practice, in terms of information selection patterns? (§4.3)



Table 2: Performance comparison across different formulations, encoder attention mechanisms, and positional encoding (PE) sharing strategies. **Bold** indicates the best result within each configuration (i.e., each unique combination of formulation, encoder attention, and PE sharing). A lower MSE or MAE indicates a better performance. The last row in each configuration block corresponds to our proposed model. Each column reports the average performance over four prediction lengths  $H \in \{96, 192, 336, 720\}$  with input length  $L = 384$ .

| Formulation | Encoder Attention        | PE Sharing  | ETTh1        |              | ETTm1        |              | Solar        |              | ECL          |              |
|-------------|--------------------------|-------------|--------------|--------------|--------------|--------------|--------------|--------------|--------------|--------------|
|             |                          |             | MSE          | MAE          | MSE          | MAE          | MSE          | MAE          | MSE          | MAE          |
| Standard    | Latent Bottleneck        | Sharing     | 0.420        | 0.437        | 0.355        | 0.382        | 0.194        | 0.243        | 0.169        | 0.265        |
| Generalized | Latent Bottleneck        | Sharing     | <b>0.404</b> | <b>0.420</b> | <b>0.338</b> | <b>0.370</b> | <b>0.182</b> | <b>0.233</b> | <b>0.157</b> | <b>0.249</b> |
| Generalized | Full Self-Attention      | Sharing     | 0.425        | 0.434        | 0.353        | 0.375        | 0.192        | 0.237        | 0.161        | 0.254        |
| Generalized | Decoupled Self-Attention | Sharing     | 0.423        | 0.433        | 0.356        | 0.379        | 0.189        | <b>0.233</b> | 0.158        | 0.250        |
| Generalized | Latent Bottleneck        | Sharing     | <b>0.404</b> | <b>0.420</b> | <b>0.338</b> | <b>0.370</b> | <b>0.182</b> | <b>0.233</b> | <b>0.157</b> | <b>0.249</b> |
| Generalized | Latent Bottleneck        | Not Sharing | 0.423        | 0.432        | 0.342        | 0.374        | 0.193        | <b>0.232</b> | 0.163        | 0.254        |
| Generalized | Latent Bottleneck        | Sharing     | <b>0.404</b> | <b>0.420</b> | <b>0.338</b> | <b>0.370</b> | <b>0.182</b> | 0.233        | <b>0.157</b> | <b>0.249</b> |

**Baselines.** To ensure a comprehensive comparison, we include strong recent baselines such as DeformableTST [7], CARD [8], CATS [9], PatchTST [4], and iTransformer [6], which are Transformer-based, as well as models including SSM-based S-Mamba [17], CNN-based TimesNet [11], and MLP-based DLinear [13], and TiDE [14]. Our focus on Transformer-based methods reflects the architecture of our proposed model. Among these, CARD [8], iTransformer [6], S-Mamba [17], and TimesNet [11] can be categorized as channel-dependent models due to their explicit modeling of inter-variable interactions, while the rest are considered channel-independent.

**Setup.** We evaluate our model on 8 real-world multivariate time series datasets, including ETT (ETTh1, ETTh2, ETTm1, ETTm2) [22], Weather [1], Solar [21], Electricity [2], and Traffic [3] to ensure robustness across diverse temporal patterns and domains. Detailed dataset explanation is described in Appendix A. To ensure fair and robust evaluation with other models, we average results across multiple input lengths {96, 384, 768} for each prediction length {96, 192, 336, 720}, e.g., the main comparisons in Table 1. For results reported in DeformableTST [7], we directly refer to their values, while missing entries are reproduced under the same settings. All other experiments, including ablations and model-specific analysis, are conducted with a fixed input length of 384. Training details can be found in Appendix B.

#### 4.1 Multivariate Long-Term Time-Series Forecasting Results

The forecasting performance is summarized in Table 1. We evaluate forecasting performance using MSE and MAE, where lower values indicate better results. Across 8 datasets and 4 forecasting horizons, with two metrics per setting (MSE and MAE), our method achieves 55 best and 17 second best scores out of 80, establishing a new state-of-the-art. Notably, our model significantly outperforms recent channel-dependent methods such as CARD [8] and iTransformer [6]. When averaged across all datasets, our model achieves a 5.6% improvement in MSE and a 4.4% improvement in MAE compared to CARD. Against iTransformer, the improvements are even more substantial, with 8.5% lower MSE and 7.3% lower MAE, highlighting our model’s strong capability in capturing complex temporal-channel dependencies.

#### 4.2 Component Ablation Studies

We present a component-wise analysis of our forecasting framework, focusing on three key design decisions: the formulation of the forecasting objective, the encoder attention mechanism, and the decoder design. Each choice offers multiple alternatives, and understanding their impact is critical to the final model performance. Table 2 summarizes the performance of various configurations. In the following, we analyze each component in detail and justify the decisions behind our proposed architecture. Full results are provided in Appendix D.

**Formulation.** We compare the *Standard Formulation*, where the model is trained to predict future values given a continuous segment of past observations, against the *Generalized Formulation*, which

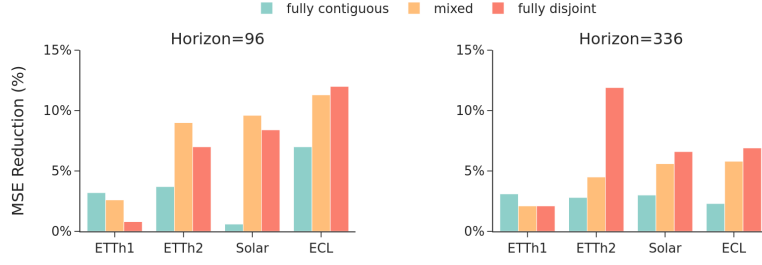

Figure 3: Relative MSE reduction (%) compared to the standard formulation with varying sampling strategies for target patches under input length  $L = 384$  and two prediction lengths  $H \in \{96, 336\}$ . Sampling strategies are (a) fully contiguous: only one contiguous segment in  $\mathcal{J}_{\text{patch}}$ , (b) fully disjoint: selected target indices are fully arbitrary, and (c) mixed: two equal-sized segments in  $\mathcal{J}_{\text{patch}}$ . Higher values indicate greater improvements over the standard formulation.

unifies extrapolation, interpolation, and imputation within a forecasting task described in Section 3.1. This broader formulation allows the model to learn from more diverse temporal prediction objectives by randomly sampling prediction targets along the temporal axis. The results show that our generalized formulation consistently yields better performance across all datasets and metrics, achieving an average improvement of 5.0% in MSE and 3.4% in MAE. This demonstrates the benefit of exposing the model to a wider range of temporal reasoning tasks during training, improving its ability to generalize across different forecasting scenarios.

To further analyze our generalized formulation, we implement three different patch sampling strategies: (a) selecting target patch indices  $\mathcal{J}_{\text{patch}}$  contiguously (*i.e.*, fully contiguous), (b) selecting  $\mathcal{J}_{\text{patch}}$  randomly (*i.e.*, fully disjoint), and (c) selecting  $\mathcal{J}_{\text{patch}}$  including two contiguous, equal-sized segments (*i.e.*, mixed). The forecasting results are reported in Figure 3. All the strategies contribute to performance improvement, but the optimal configuration varies with dataset characteristics and prediction lengths. For example, while ETTh1 favors contiguous sampling, others benefit more from disjoint or mixed strategies—even among similar datasets such as ETTh1 and ETTh2. This highlights the importance of selecting an appropriate sampling ratio based on the specific forecasting context. Without hyperparameter tuning, selecting two equal-sized segments consistently yields reliable performance and serves as a robust default.

**Encoder Attention.** We compare different encoder attention mechanisms to understand how temporal and channel dependencies should be modeled. The *Self-Attention* approach directly applies attention across input tokens, either jointly across temporal and channel dimensions or by splitting them. While simple, this method incurs a large memory and computation cost, especially as the number of input channels or time steps grows. Moreover, attending over all input tokens jointly can lead to diluted attention scores and unstable optimization. To address these issues, we adopt the *Latent Bottleneck* approach, where a fixed set of latent tokens attends to the input. This design enables the model to compress relevant information from the input space into a smaller latent space, reducing the attention complexity from  $\mathcal{O}(N^2)$  to  $\mathcal{O}(NM)$ , where  $M \ll N$  is the number of latent tokens. Unlike axis-separated attention, this latent-based method captures temporal and inter-channel dependencies jointly, leading to more expressive and efficient representations. Our results show that *Latent Bottleneck* outperforms both self-attention variants across all datasets.

**Decoder Design.** In query-based decoding, it is essential for the model to distinguish between time points used as input and those expected as output. To enable this, we apply both temporal and channel positional embeddings, TPE and CPE, not only into the encoder but also into the decoder queries. We compare two strategies: one where the encoder and decoder share the same positional embeddings, and another where they use separate embeddings. As shown in Table 2, using shared positional embeddings generally leads to better performance across most datasets, supporting the importance of temporal alignment between encoder inputs and decoder queries. An exception is observed in the Solar dataset, where non-shared embeddings slightly outperform the shared version in terms of MAE.

### 4.3 Cross-Attention Analysis

To better understand how our model processes information throughout encoding and decoding, we visualize the cross-attention maps in Figure 4, using examples from the ETTh1 and ETTm1 datasets.



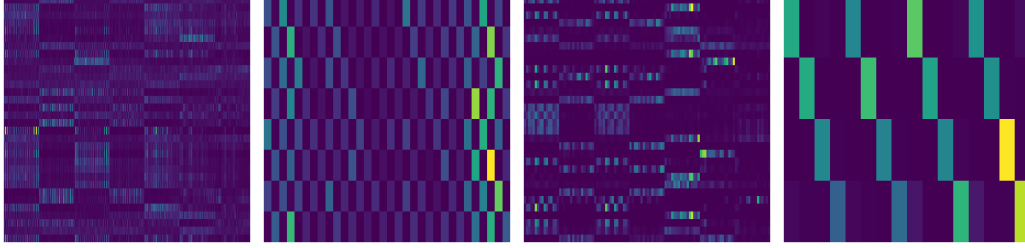

(a) Encoder and decoder attention on **ETTh1**

(b) Encoder and decoder attention on **ETTh1**

Figure 4: Cross-attention maps from the encoder and decoder on ETTh1 and ETTm1. For each dataset, the left image shows attention from latent tokens to input patches (encoder), and the right shows attention from query tokens to input patches (decoder). In encoder maps, the x-axis shows flattened input patch indices ( $C \times |\mathcal{I}_{\text{patch}}|$ ), and the y-axis represents latent tokens ( $M$ ). In decoder maps, the x-axis is temporal input positions ( $|\mathcal{I}_{\text{patch}}|$ ,  $L=384$ ), and the y-axis is query tokens aligned with prediction patches ( $|\mathcal{J}_{\text{patch}}|$ ,  $H=96$ ). Each token spans 12 hours (ETTh1) or 6 hours (ETTh1).

For each dataset, the left side of the figure shows encoder-side attention from latent tokens to input patches, while the right side depicts decoder-side attention from query tokens to input patches. The encoder attention maps reveal that latent tokens distribute their focus across diverse regions of the input, spanning both temporal and channel dimensions. Rather than converging on a single dominant region, each latent appears to capture distinct patterns or features, indicating that the model effectively compresses input information while maintaining representational diversity.

On the decoder side, the attention maps illustrate how query tokens attend to input patches in a temporally structured manner. Queries often align with regularly spaced regions in the input, suggesting that the model learns to exploit periodic patterns in the data. In ETTh1, where each input patch covers 12 hours, decoder queries commonly attend to patches spaced about two positions apart—roughly corresponding to a daily cycle (24 hours). In ETTm1, where each patch covers a fixed time span of 6 hours, the attention aligns with intervals of four positions, reflecting a quarter-day rhythm. These resolution-aware patterns demonstrate the model’s ability to adapt its decoding strategy to the temporal resolution of the dataset and capture underlying periodic structure effectively.

## 5 Related Work

Recent time-series forecasting research has mainly focused on encoder design, particularly on modeling channel interactions, categorized as channel-independent (CI) [4, 7, 9, 13, 14] or channel-dependent (CD) approaches [5, 6, 8, 11, 17]. While CD methods leverage richer inter-channel information, effectively utilizing it remains challenging, leading to recent attempts to capture both temporal and cross-channel dependencies separately [5, 6]. Meanwhile, most models still rely on simple linear projections [4, 6, 7] from encoder outputs for prediction, using a uniform training formulation [6–11, 13, 14, 17]. Although query-based decoders [9] have recently developed for time-series forecasting, they do not study how to effectively encode the input time series. In contrast, our unified framework leverages a generalized formulation with an optimized structure.

## 6 Conclusion

In this work, we propose TIMEPERCEIVER, a unified framework that integrates architectural design and training strategy for multivariate time-series forecasting. Specifically, we introduce a generalized forecasting formulation that encompasses extrapolation, interpolation, and imputation. To support this formulation, we design a novel encoder-decoder architecture equipped with latent bottleneck representations and query-based decoding, enabling flexible modeling of arbitrarily positioned input and target segments. Extensive experiments across diverse benchmarks demonstrate that our framework consistently outperforms prior state-of-the-art methods. We hope our work encourages the community to explore holistic modeling approaches that align architectural choices more closely with the underlying forecasting objectives.

**Limitations and Broader Impacts.** Please refer to Appendix E for further discussion.

## References

- [1] Wetterstation. Weather. <https://www.bgc-jena.mpg.de/wetter/>.
- [2] UCI. Electricity. <https://archive.ics.uci.edu/ml/datasets/ElectricityLoadDiagrams20112014>.
- [3] PeMS. Traffic. <http://pems.dot.ca.gov/>.
- [4] Yuqi Nie, Nam H. Nguyen, Phanwadee Sinthong, and Jayant Kalagnanam. A time series is worth 64 words: Long-term forecasting with transformers. In *International Conference on Learning Representations (ICLR)*, 2023.
- [5] Yunhao Zhang and Junchi Yan. Crossformer: Transformer utilizing cross-dimension dependency for multivariate time series forecasting. In *International Conference on Learning Representations (ICLR)*, 2023.
- [6] Yong Liu, Tengge Hu, Haoran Zhang, Haixu Wu, Shiyu Wang, Lintao Ma, and Mingsheng Long. itransformer: Inverted transformers are effective for time series forecasting. In *International Conference on Learning Representations (ICLR)*, 2024.
- [7] Luo Dongha and Wang Xue. DeformableTST: Transformer for time series forecasting without over-reliance on patching. In *Advances in Neural Information Processing Systems (NeurIPS)*, 2024.
- [8] Wang Xue, Tian Zhou, Qingsong Wen, Jinyang Gao, Bolin Ding, and Rong Jin. Card: Channel aligned robust blend transformer for time series forecasting. In *International Conference on Learning Representations (ICLR)*, 2024.
- [9] Dongbin Kim, Jinseong Park, Jaewook Lee, and Hoki Kim. Are self-attentions effective for time series forecasting? In *Advances in Neural Information Processing Systems (NeurIPS)*, 2024.
- [10] Peng Chen, Yingying Zhang, Yunyao Cheng, Yang Shu, Yihang Wang, Qingsong Wen, Bin Yang, and Chenjuan Guo. Pathformer: Multi-scale transformers with adaptive pathways for time series forecasting. In *International Conference on Learning Representations (ICLR)*, 2024.
- [11] Haixu Wu, Tengge Hu, Yong Liu, Hang Zhou, Jianmin Wang, and Mingsheng Long. Timesnet: Temporal 2d-variation modeling for general time series analysis. In *International Conference on Learning Representations (ICLR)*, 2023.
- [12] Zeying Gong, Yujin Tang, and Junwei Liang. Patchmixer: A patch-mixing architecture for long-term time series forecasting, 2024.
- [13] Ailing Zeng, Muxi Chen, Lei Zhang, and Qiang Xu. Are transformers effective for time series forecasting? In *The Association for the Advancement of Artificial Intelligence (AAAI)*, 2022.
- [14] Abhimanyu Das, Weihao Kong, Andrew Leach, Shaan K Mathur, Rajat Sen, and Rose Yu. Long-term forecasting with tiDE: Time-series dense encoder. *Transactions on Machine Learning Research*, 2023.
- [15] Si-An Chen, Chun-Liang Li, Serkan O Arik, Nathanael Christian Yoder, and Tomas Pfister. TSMixer: An all-MLP architecture for time series forecast-ing. *Transactions on Machine Learning Research*, 2023.
- [16] Seunghan Lee, Taeyoung Park, and Kibok Lee. Learning to embed time series patches independently. In *International Conference on Learning Representations (ICLR)*, 2024.
- [17] Zihan Wang, Fanheng Kong, Shi Feng, Ming Wang, Xiaocui Yang, Han Zhao, Daling Wang, and Yifei Zhang. Is mamba effective for time series forecasting?, 2024.
- [18] Seunghan Lee, Juri Hong, Kibok Lee, and Taeyoung Park. Sequential order-robust mamba for time series forecasting, 2024.
- [19] Lu Han, Han-Jia Ye, and De-Chuan Zhan. The capacity and robustness trade-off: Revisiting the channel independent strategy for multivariate time series forecasting. *arXiv preprint arXiv:2304.05206*, 2023.

- [20] Jacob Devlin, Ming-Wei Chang, Kenton Lee, and Kristina Toutanova. Bert: Pre-training of deep bidirectional transformers for language understanding, 2019.
- [21] National Renewable Energy Laboratory. Solar power data for integration studies. <https://www.nrel.gov/grid/solar-power-data.html>.
- [22] Jianxin Li, Xiong Hui, and Wancai Zhang. Informer: Beyond efficient transformer for long sequence time-series forecasting. In *The Association for the Advancement of Artificial Intelligence (AAAI)*, 2021.
- [23] Ashish Vaswani, Noam Shazeer, Niki Parmar, Jakob Uszkoreit, Llion Jones, Aidan N Gomez, Łukasz Kaiser, and Illia Polosukhin. Attention is all you need. In *Advances in Neural Information Processing Systems (NeurIPS)*, 2017.
- [24] Alexey Dosovitskiy, Lucas Beyer, Alexander Kolesnikov, Dirk Weissenborn, Xiaohua Zhai, Thomas Unterthiner, Mostafa Dehghani, Matthias Minderer, Georg Heigold, Sylvain Gelly, Jakob Uszkoreit, and Neil Houlsby. An image is worth 16x16 words: Transformers for image recognition at scale. In *International Conference on Learning Representations (ICLR)*, 2021.
- [25] Jimmy Lei Ba, Jamie Ryan Kiros, and Geoffrey E. Hinton. Layer normalization, 2016.
- [26] Ilya Loshchilov and Frank Hutter. Decoupled weight decay regularization. In *International Conference on Learning Representations (ICLR)*, 2019.
- [27] Taesung Kim, Jinhee Kim, Yunwon Tae, Cheonbok Park, Jang-Ho Choi, and Jaegul Choo. Reversible instance normalization for accurate time-series forecasting against distribution shift. In *International Conference on Learning Representations*, 2022.
- [28] Adam Paszke, Sam Gross, Francisco Massa, Adam Lerer, James Bradbury, Gregory Chanan, Trevor Killeen, Zeming Lin, Natalia Gimelshein, Luca Antiga, Alban Desmaison, Andreas Köpf, Edward Yang, Zach DeVito, Martin Raison, Alykhan Tejani, Sasank Chilamkurthy, Benoit Steiner, Lu Fang, Junjie Bai, and Soumith Chintala. Pytorch: An imperative style, high-performance deep learning library. In *Advances in Neural Information Processing Systems (NeurIPS)*, 2019.
- [29] Andrew Jaegle, Sebastian Borgeaud, Jean-Baptiste Alayrac, Carl Doersch, Catalin Ionescu, David Ding, Skanda Koppula, Daniel Zoran, Andrew Brock, Evan Shelhamer, Olivier Hénaff, Matthew M. Botvinick, Andrew Zisserman, Oriol Vinyals, and João Carreira. Perceiver io: A general architecture for structured inputs & outputs. In *International Conference on Learning Representations (ICLR)*, 2022.
- [30] Jason Weston, Sumit Chopra, and Antoine Bordes. Memory networks. In *International Conference on Learning Representations (ICLR)*, 2015.
- [31] Francesco Locatello, Dirk Weissenborn, Thomas Unterthiner, Aravindh Mahendran, Georg Heigold, Jakob Uszkoreit, Alexey Dosovitskiy, and Thomas Kipf. Object-centric learning with slot attention, 2020.
- [32] Juho Lee, Yoonho Lee, Jungtaek Kim, Adam Kosiorek, Seungjin Choi, and Yee Whye Teh. Set transformer: A framework for attention-based permutation-invariant neural networks. In *International Conference on Machine Learning*, 2019.
- [33] Mikhail S. Burtsev, Yuri Kuratov, Anton Peganov, and Grigory V. Sapunov. Memory transformer, 2021.
- [34] Zhenwei Zhang, Linghang Meng, and Yuantao Gu. Sageformer: Series-aware framework for long-term multivariate time series forecasting. *IEEE Internet of Things Journal*, 2024.
- [35] Qihe Huang, Lei Shen, Ruixin Zhang, Shouhong Ding, Binwu Wang, Zhengyang Zhou, and Yang Wang. CrossGNN: Confronting noisy multivariate time series via cross interaction refinement. In *Advances in Neural Information Processing Systems (NeurIPS)*, 2023.
- [36] Wanlin Cai, Yuxuan Liang, Xianggen Liu, Jianshuai Feng, and Yuankai Wu. Msgnet: Learning multi-scale inter-series correlations for multivariate time series forecasting. In *The Association for the Advancement of Artificial Intelligence (AAAI)*, 2024.

## NeurIPS Paper Checklist

### 1. Claims

Question: Do the main claims made in the abstract and introduction accurately reflect the paper's contributions and scope?

Answer: [\[Yes\]](#)

Justification: Please refer to the abstract and Section 1.

Guidelines:

- The answer NA means that the abstract and introduction do not include the claims made in the paper.
- The abstract and/or introduction should clearly state the claims made, including the contributions made in the paper and important assumptions and limitations. A No or NA answer to this question will not be perceived well by the reviewers.
- The claims made should match theoretical and experimental results, and reflect how much the results can be expected to generalize to other settings.
- It is fine to include aspirational goals as motivation as long as it is clear that these goals are not attained by the paper.

### 2. Limitations

Question: Does the paper discuss the limitations of the work performed by the authors?

Answer: [\[Yes\]](#)

Justification: Please refer to Appendix E.

Guidelines:

- The answer NA means that the paper has no limitation while the answer No means that the paper has limitations, but those are not discussed in the paper.
- The authors are encouraged to create a separate "Limitations" section in their paper.
- The paper should point out any strong assumptions and how robust the results are to violations of these assumptions (e.g., independence assumptions, noiseless settings, model well-specification, asymptotic approximations only holding locally). The authors should reflect on how these assumptions might be violated in practice and what the implications would be.
- The authors should reflect on the scope of the claims made, e.g., if the approach was only tested on a few datasets or with a few runs. In general, empirical results often depend on implicit assumptions, which should be articulated.
- The authors should reflect on the factors that influence the performance of the approach. For example, a facial recognition algorithm may perform poorly when image resolution is low or images are taken in low lighting. Or a speech-to-text system might not be used reliably to provide closed captions for online lectures because it fails to handle technical jargon.
- The authors should discuss the computational efficiency of the proposed algorithms and how they scale with dataset size.
- If applicable, the authors should discuss possible limitations of their approach to address problems of privacy and fairness.
- While the authors might fear that complete honesty about limitations might be used by reviewers as grounds for rejection, a worse outcome might be that reviewers discover limitations that aren't acknowledged in the paper. The authors should use their best judgment and recognize that individual actions in favor of transparency play an important role in developing norms that preserve the integrity of the community. Reviewers will be specifically instructed to not penalize honesty concerning limitations.

### 3. Theory assumptions and proofs

Question: For each theoretical result, does the paper provide the full set of assumptions and a complete (and correct) proof?

Answer: [\[NA\]](#)

Justification: This paper does not include theoretical results.

Guidelines:

- The answer NA means that the paper does not include theoretical results.
- All the theorems, formulas, and proofs in the paper should be numbered and cross-referenced.
- All assumptions should be clearly stated or referenced in the statement of any theorems.
- The proofs can either appear in the main paper or the supplemental material, but if they appear in the supplemental material, the authors are encouraged to provide a short proof sketch to provide intuition.
- Inversely, any informal proof provided in the core of the paper should be complemented by formal proofs provided in appendix or supplemental material.
- Theorems and Lemmas that the proof relies upon should be properly referenced.

#### 4. Experimental result reproducibility

Question: Does the paper fully disclose all the information needed to reproduce the main experimental results of the paper to the extent that it affects the main claims and/or conclusions of the paper (regardless of whether the code and data are provided or not)?

Answer: [Yes]

Justification: Please refer to Section 3, Section 4, and Appendix B.

Guidelines:

- The answer NA means that the paper does not include experiments.
- If the paper includes experiments, a No answer to this question will not be perceived well by the reviewers: Making the paper reproducible is important, regardless of whether the code and data are provided or not.
- If the contribution is a dataset and/or model, the authors should describe the steps taken to make their results reproducible or verifiable.
- Depending on the contribution, reproducibility can be accomplished in various ways. For example, if the contribution is a novel architecture, describing the architecture fully might suffice, or if the contribution is a specific model and empirical evaluation, it may be necessary to either make it possible for others to replicate the model with the same dataset, or provide access to the model. In general, releasing code and data is often one good way to accomplish this, but reproducibility can also be provided via detailed instructions for how to replicate the results, access to a hosted model (e.g., in the case of a large language model), releasing of a model checkpoint, or other means that are appropriate to the research performed.
- While NeurIPS does not require releasing code, the conference does require all submissions to provide some reasonable avenue for reproducibility, which may depend on the nature of the contribution. For example
  - (a) If the contribution is primarily a new algorithm, the paper should make it clear how to reproduce that algorithm.
  - (b) If the contribution is primarily a new model architecture, the paper should describe the architecture clearly and fully.
  - (c) If the contribution is a new model (e.g., a large language model), then there should either be a way to access this model for reproducing the results or a way to reproduce the model (e.g., with an open-source dataset or instructions for how to construct the dataset).
  - (d) We recognize that reproducibility may be tricky in some cases, in which case authors are welcome to describe the particular way they provide for reproducibility. In the case of closed-source models, it may be that access to the model is limited in some way (e.g., to registered users), but it should be possible for other researchers to have some path to reproducing or verifying the results.

#### 5. Open access to data and code

Question: Does the paper provide open access to the data and code, with sufficient instructions to faithfully reproduce the main experimental results, as described in supplemental material?



Answer: [Yes]

Justification: The code is accessible via Appendix B, where the full training setup is also detailed. All datasets used in our experiments are properly cited and can be accessed through the corresponding references.

Guidelines:

- The answer NA means that paper does not include experiments requiring code.
- Please see the NeurIPS code and data submission guidelines (<https://nips.cc/public/guides/CodeSubmissionPolicy>) for more details.
- While we encourage the release of code and data, we understand that this might not be possible, so “No” is an acceptable answer. Papers cannot be rejected simply for not including code, unless this is central to the contribution (e.g., for a new open-source benchmark).
- The instructions should contain the exact command and environment needed to run to reproduce the results. See the NeurIPS code and data submission guidelines (<https://nips.cc/public/guides/CodeSubmissionPolicy>) for more details.
- The authors should provide instructions on data access and preparation, including how to access the raw data, preprocessed data, intermediate data, and generated data, etc.
- The authors should provide scripts to reproduce all experimental results for the new proposed method and baselines. If only a subset of experiments are reproducible, they should state which ones are omitted from the script and why.
- At submission time, to preserve anonymity, the authors should release anonymized versions (if applicable).
- Providing as much information as possible in supplemental material (appended to the paper) is recommended, but including URLs to data and code is permitted.

## 6. Experimental setting/details

Question: Does the paper specify all the training and test details (e.g., data splits, hyperparameters, how they were chosen, type of optimizer, etc.) necessary to understand the results?

Answer: [Yes]

Justification: Please refer to Section 4 and Appendix B.

Guidelines:

- The answer NA means that the paper does not include experiments.
- The experimental setting should be presented in the core of the paper to a level of detail that is necessary to appreciate the results and make sense of them.
- The full details can be provided either with the code, in appendix, or as supplemental material.

## 7. Experiment statistical significance

Question: Does the paper report error bars suitably and correctly defined or other appropriate information about the statistical significance of the experiments?

Answer: [No]

Justification: All reported results are **averaged over five trials**. We found that the error bars are negligible, and due to space constraints, the error bars are omitted from our main table. Full experimental results will be made publicly available with our codebase.

Guidelines:

- The answer NA means that the paper does not include experiments.
- The authors should answer "Yes" if the results are accompanied by error bars, confidence intervals, or statistical significance tests, at least for the experiments that support the main claims of the paper.
- The factors of variability that the error bars are capturing should be clearly stated (for example, train/test split, initialization, random drawing of some parameter, or overall run with given experimental conditions).

- The method for calculating the error bars should be explained (closed form formula, call to a library function, bootstrap, etc.)
- The assumptions made should be given (e.g., Normally distributed errors).
- It should be clear whether the error bar is the standard deviation or the standard error of the mean.
- It is OK to report 1-sigma error bars, but one should state it. The authors should preferably report a 2-sigma error bar than state that they have a 96% CI, if the hypothesis of Normality of errors is not verified.
- For asymmetric distributions, the authors should be careful not to show in tables or figures symmetric error bars that would yield results that are out of range (e.g. negative error rates).
- If error bars are reported in tables or plots, The authors should explain in the text how they were calculated and reference the corresponding figures or tables in the text.

## 8. Experiments compute resources

Question: For each experiment, does the paper provide sufficient information on the computer resources (type of compute workers, memory, time of execution) needed to reproduce the experiments?

Answer: [Yes]

Justification: Please refer to Appendix B.

Guidelines:

- The answer NA means that the paper does not include experiments.
- The paper should indicate the type of compute workers CPU or GPU, internal cluster, or cloud provider, including relevant memory and storage.
- The paper should provide the amount of compute required for each of the individual experimental runs as well as estimate the total compute.
- The paper should disclose whether the full research project required more compute than the experiments reported in the paper (e.g., preliminary or failed experiments that didn't make it into the paper).

## 9. Code of ethics

Question: Does the research conducted in the paper conform, in every respect, with the NeurIPS Code of Ethics <https://neurips.cc/public/EthicsGuidelines>?

Answer: [Yes]

Justification: Please refer to Appendix E.

Guidelines:

- The answer NA means that the authors have not reviewed the NeurIPS Code of Ethics.
- If the authors answer No, they should explain the special circumstances that require a deviation from the Code of Ethics.
- The authors should make sure to preserve anonymity (e.g., if there is a special consideration due to laws or regulations in their jurisdiction).

## 10. Broader impacts

Question: Does the paper discuss both potential positive societal impacts and negative societal impacts of the work performed?

Answer: [Yes]

Justification: Please refer to Appendix E.

Guidelines:

- The answer NA means that there is no societal impact of the work performed.
- If the authors answer NA or No, they should explain why their work has no societal impact or why the paper does not address societal impact.
- Examples of negative societal impacts include potential malicious or unintended uses (e.g., disinformation, generating fake profiles, surveillance), fairness considerations (e.g., deployment of technologies that could make decisions that unfairly impact specific groups), privacy considerations, and security considerations.

- The conference expects that many papers will be foundational research and not tied to particular applications, let alone deployments. However, if there is a direct path to any negative applications, the authors should point it out. For example, it is legitimate to point out that an improvement in the quality of generative models could be used to generate deepfakes for disinformation. On the other hand, it is not needed to point out that a generic algorithm for optimizing neural networks could enable people to train models that generate Deepfakes faster.
- The authors should consider possible harms that could arise when the technology is being used as intended and functioning correctly, harms that could arise when the technology is being used as intended but gives incorrect results, and harms following from (intentional or unintentional) misuse of the technology.
- If there are negative societal impacts, the authors could also discuss possible mitigation strategies (e.g., gated release of models, providing defenses in addition to attacks, mechanisms for monitoring misuse, mechanisms to monitor how a system learns from feedback over time, improving the efficiency and accessibility of ML).

## 11. Safeguards

Question: Does the paper describe safeguards that have been put in place for responsible release of data or models that have a high risk for misuse (e.g., pretrained language models, image generators, or scraped datasets)?

Answer: [NA]

Justification: The paper poses no such risks.

Guidelines:

- The answer NA means that the paper poses no such risks.
- Released models that have a high risk for misuse or dual-use should be released with necessary safeguards to allow for controlled use of the model, for example by requiring that users adhere to usage guidelines or restrictions to access the model or implementing safety filters.
- Datasets that have been scraped from the Internet could pose safety risks. The authors should describe how they avoided releasing unsafe images.
- We recognize that providing effective safeguards is challenging, and many papers do not require this, but we encourage authors to take this into account and make a best faith effort.

## 12. Licenses for existing assets

Question: Are the creators or original owners of assets (e.g., code, data, models), used in the paper, properly credited and are the license and terms of use explicitly mentioned and properly respected?

Answer: [Yes]

Justification: We only use publicly available time-series forecasting benchmarks and open-source codebases. All datasets and code are properly credited and cited in accordance with their licenses and terms of use.

Guidelines:

- The answer NA means that the paper does not use existing assets.
- The authors should cite the original paper that produced the code package or dataset.
- The authors should state which version of the asset is used and, if possible, include a URL.
- The name of the license (e.g., CC-BY 4.0) should be included for each asset.
- For scraped data from a particular source (e.g., website), the copyright and terms of service of that source should be provided.
- If assets are released, the license, copyright information, and terms of use in the package should be provided. For popular datasets, [paperswithcode.com/datasets](https://paperswithcode.com/datasets) has curated licenses for some datasets. Their licensing guide can help determine the license of a dataset.

- For existing datasets that are re-packaged, both the original license and the license of the derived asset (if it has changed) should be provided.
- If this information is not available online, the authors are encouraged to reach out to the asset’s creators.

### 13. New assets

Question: Are new assets introduced in the paper well documented and is the documentation provided alongside the assets?

Answer: [\[Yes\]](#)

Justification: Please refer to Section 3, Section 4 and Appendix B. The code is accessible via Appendix B, where the full training setup is also detailed.

Guidelines:

- The answer NA means that the paper does not release new assets.
- Researchers should communicate the details of the dataset/code/model as part of their submissions via structured templates. This includes details about training, license, limitations, etc.
- The paper should discuss whether and how consent was obtained from people whose asset is used.
- At submission time, remember to anonymize your assets (if applicable). You can either create an anonymized URL or include an anonymized zip file.

### 14. Crowdsourcing and research with human subjects

Question: For crowdsourcing experiments and research with human subjects, does the paper include the full text of instructions given to participants and screenshots, if applicable, as well as details about compensation (if any)?

Answer: [\[NA\]](#)

Justification: The paper does not involve crowdsourcing nor research with human subjects.

Guidelines:

- The answer NA means that the paper does not involve crowdsourcing nor research with human subjects.
- Including this information in the supplemental material is fine, but if the main contribution of the paper involves human subjects, then as much detail as possible should be included in the main paper.
- According to the NeurIPS Code of Ethics, workers involved in data collection, curation, or other labor should be paid at least the minimum wage in the country of the data collector.

### 15. Institutional review board (IRB) approvals or equivalent for research with human subjects

Question: Does the paper describe potential risks incurred by study participants, whether such risks were disclosed to the subjects, and whether Institutional Review Board (IRB) approvals (or an equivalent approval/review based on the requirements of your country or institution) were obtained?

Answer: [\[NA\]](#)

Justification: The paper does not involve crowdsourcing nor research with human subjects.

Guidelines:

- The answer NA means that the paper does not involve crowdsourcing nor research with human subjects.
- Depending on the country in which research is conducted, IRB approval (or equivalent) may be required for any human subjects research. If you obtained IRB approval, you should clearly state this in the paper.
- We recognize that the procedures for this may vary significantly between institutions and locations, and we expect authors to adhere to the NeurIPS Code of Ethics and the guidelines for their institution.

718                   • For initial submissions, do not include any information that would break anonymity (if  
719                   applicable), such as the institution conducting the review.

720   **16. Declaration of LLM usage**

721   Question: Does the paper describe the usage of LLMs if it is an important, original, or  
722   non-standard component of the core methods in this research? Note that if the LLM is used  
723   only for writing, editing, or formatting purposes and does not impact the core methodology,  
724   scientific rigorousness, or originality of the research, declaration is not required.

725   Answer: [NA]

726   Justification: LLMs did not contribute to the core method development in this research in  
727   any essential or novel capacity.

728   Guidelines:

729                   • The answer NA means that the core method development in this research does not  
730                   involve LLMs as any important, original, or non-standard components.

731                   • Please refer to our LLM policy (<https://neurips.cc/Conferences/2025/LLM>)  
732                   for what should or should not be described.



## Appendix

### A Dataset

Table 3: Details of benchmark datasets used in our experiments.

| Dataset     | Variables | Frequency  | Time Steps | Domain         |
|-------------|-----------|------------|------------|----------------|
| ETTh1       | 7         | 1 hour     | 17,420     | Temperature    |
| ETTh2       | 7         | 1 hour     | 17,420     | Temperature    |
| ETTm1       | 7         | 15 minutes | 69,680     | Temperature    |
| ETTm2       | 7         | 15 minutes | 69,680     | Temperature    |
| Weather     | 21        | 10 minutes | 52,696     | Weather        |
| Solar       | 137       | 10 minutes | 52,560     | Energy         |
| Electricity | 321       | 1 hour     | 26,304     | Electricity    |
| Traffic     | 862       | 1 hour     | 17,544     | Transportation |

We utilize 8 widely adopted benchmark datasets for time series forecasting: ETT (ETTh1, ETTh2, ETTm1, ETTm2) [22], Weather [1], Solar [21], Electricity [2], and Traffic [3]. These datasets are commonly used in recent time series forecasting literature and span a wide range of temporal resolutions, domains, and sequence characteristics. Descriptions of each dataset are provided as follows, while detailed statistics such as data size and sampling frequency are summarized in Table 3.

- **ETT** [22] contains 7 variables from two electricity transformers between 2016 and 2018, with four subsets: ETTh1/ETTh2 (hourly) and ETTm1/ETTm2 (every 15 minutes).
- **Weather** [1] contains 21 meteorological variables collected from a weather station in Germany during 2020.
- **Solar** [21] contains 137 variables representing solar power generation from photovoltaic plants in Alabama during 2006.
- **Electricity** [2] contains hourly electricity consumption variables from 321 clients, collected between 2012 and 2014.
- **Traffic** [3] contains road occupancy rate variables measured hourly by 862 sensors on San Francisco Bay Area freeways, covering the period from 2015 to 2016.

Following the standard protocol [7, 22] widely adopted in time series forecasting research, we perform a chronological split of each dataset. For the ETT datasets, we use a 6:2:2 ratio for training, validation, and testing. For the remaining datasets—Weather, Solar, Electricity, and Traffic—we apply a 7:1:2 split.

**Algorithm 1** TIMEPERCEIVER

---

**Require:** Concatenated input token sequence  $\mathbf{X}_{\mathcal{I}_{\text{patch}}} \in \mathbb{R}^{C \times (|\mathcal{I}_{\text{patch}}|P)}$ , input token indices  $\mathcal{I}_{\text{patch}} \subset \{1, 2, \dots, N\}$ , target token indices  $\mathcal{J}_{\text{patch}} = \{1, \dots, N\} \setminus \mathcal{I}_{\text{patch}}$ , patch length  $P$ , embedding dimension  $D$ , number of latent tokens  $M$ , latent dimension  $D_L$

- 1: Apply instance normalization (RevIN) to  $\mathbf{X}_{\mathcal{I}_{\text{patch}}}$  and store  $(\mu, \sigma)$
- 2:  $\mathbf{H}^{(0)} = \mathbf{X}_{\mathcal{I}_{\text{patch}}} \mathbf{W}_{\text{input}} + \mathbf{E}^{\text{channel}} + \mathbf{E}^{\text{temporal}}$   $\triangleright \mathbf{H}^{(0)} \in \mathbb{R}^{(C|\mathcal{I}_{\text{patch}}|) \times D}$   
 // Encode input into latent tokens (information compression)
- 3: Use learnable latent array  $\mathbf{Z}^{(0)}$   $\triangleright \mathbf{Z}^{(0)} \in \mathbb{R}^{M \times D_L}$
- 4:  $\mathbf{Z}^{(1)} = \text{AttnBlock}(\mathbf{Z}^{(0)}, \mathbf{H}^{(0)}, \mathbf{H}^{(0)})$   $\triangleright \mathbf{Z}^{(1)} \in \mathbb{R}^{M \times D_L}$
- 5: **for**  $k = 1$  to  $K$  **do**
- 6:    $\mathbf{Z}^{(k+1)} = \text{AttnBlock}(\mathbf{Z}^{(k)}, \mathbf{Z}^{(k)}, \mathbf{Z}^{(k)})$
- 7: **end for**
- 8:   // Update input tokens using refined latent representation  
     $\mathbf{H}^{(1)} = \text{AttnBlock}(\mathbf{H}^{(0)}, \mathbf{Z}^{(K+1)}, \mathbf{Z}^{(K+1)})$   $\triangleright \mathbf{H}^{(1)} \in \mathbb{R}^{(C|\mathcal{I}_{\text{patch}}|) \times D}$   
    // Predict target tokens by attending to updated input representation
- 9: Use learnable query  $\mathbf{Q}^{(0)}$   $\triangleright \mathbf{Q}^{(0)} \in \mathbb{R}^{(C|\mathcal{J}_{\text{patch}}|) \times D}$
- 10:  $\mathbf{Q}^{(1)} = \text{AttnBlock}(\mathbf{Q}^{(0)}, \mathbf{H}^{(1)}, \mathbf{H}^{(1)})$   $\triangleright \mathbf{Q}^{(1)} \in \mathbb{R}^{(C|\mathcal{J}_{\text{patch}}|) \times D}$   
    // Project query to patch-level predictions
- 11:  $\hat{\mathbf{X}}_{\mathcal{J}_{\text{patch}}} = \mathbf{Q}^{(1)} \mathbf{W}_{\text{output}}$   $\triangleright \hat{\mathbf{X}}_{\mathcal{J}_{\text{patch}}} \in \mathbb{R}^{C \times |\mathcal{J}_{\text{patch}}|P}$
- 12: Apply instance denormalization (RevIN) to restore original scale

---

**Hyperparameter Settings.** For the TIMEPERCEIVER parameter  $\theta$ , we use the AdamW optimizer [26] with a weight decay of 0.05. The learning rate is set to  $1 \times 10^{-4}$  for the Weather dataset and  $5 \times 10^{-4}$  for all other datasets, with a warmup phase of 5 epochs. We train for 50 epochs on the ETT and Solar datasets, and 100 epochs on all others. The batch size is set to 32 for the Solar, Electricity, and Traffic datasets, and 128 for the remaining datasets. We choose the patch size  $P \in \{12, 16, 24, 48\}$  and the embedding dimension  $D \in \{256, 512\}$ . The number of latents is set to  $M \in \{8, 16, 32\}$ , and the latent dimension to  $D_L \in \{64, 128, 256\}$ . For simplicity, we denote all latent dimensions as  $D$  in section 3.3, although in practice we use different values for different components. For the attention modules, we choose the number of heads  $n_{\text{heads}} \in \{4, 8\}$  and feedforward dimension  $d_{\text{ff}}$  in each attention module is set to twice the query dimension. Lastly, the separate ratio is selected from 0, 0.5, 1, corresponding to the fully disjoint, mixed, and fully contiguous sampling settings, respectively, as illustrated in Figure 3. All results are reported as the average over 5 runs with different random seeds.

**Instance Normalization.** To address distribution shifts between training and test data, we apply Reversible Instance Normalization (RevIN) [27]. Each input is normalized before processing, and the original statistics are restored after prediction.

**Reproducibility Statement.** We provide our code in the supplementary material with training and evaluation scripts to ensure reproducibility. All the experiments were conducted using NVIDIA RTX 4090 GPUs with the PyTorch [28].

**Computational Efficiency.** We empirically validate the efficiency of our proposed encoder design through comparisons across three variants: our model with a latent bottleneck, full self-attention, and decoupled self-attention. As shown in Figure 5a and Figure 5b, our method consistently achieves lower GPU memory usage and faster training time, particularly as the input length increases. This is attributed to the use of a small set of latent tokens, which enables the model to abstract and interact with the input more efficiently than direct token-to-token computation. In contrast, full self-attention suffers from quadratic complexity with respect to input length. Decoupled self-attention, which applies attention separately along the temporal and channel dimensions, avoids this quadratic scaling but still incurs higher overhead due to its dual attention structure.

Furthermore, Figure 5c highlights the parameter efficiency of query-based decoder [9]. Since each query is projected through a shared linear layer, our model maintains a nearly constant number of parameters regardless of the forecasting horizon. In contrast, models employing direct linear projection from encoded representations [4, 6], exhibit a linear growth in parameter count as the

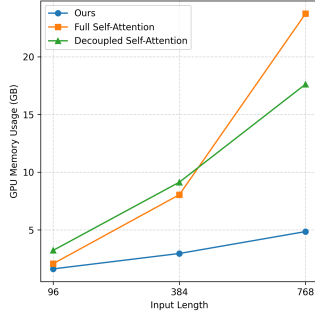

(a) GPU memory usage

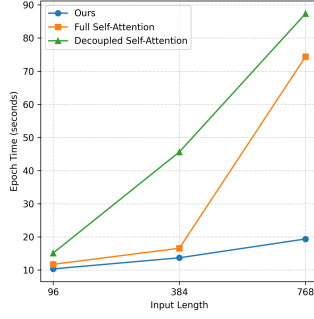

(b) Training time comparison

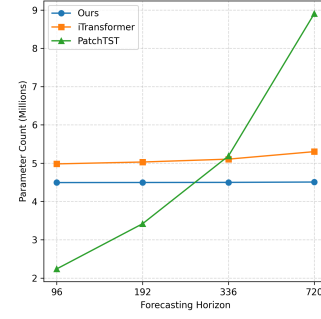

(c) Parameter comparison

Figure 5: (a) and (b) compare computational costs resulting from different encoder structures, including GPU memory usage and epoch time per input length. (c) shows the difference in parameter count between our model and other commonly used models with decoder structures based on linear projection, across various forecasting horizons.

787 prediction length increases. These results show that our design remains efficient when handling both  
788 long input sequences and extended forecasting horizons.

## C Full Results of Multivariate Long-Term Forecasting

To complement the main results reported in Table 1, we report the full forecasting performance for each input length  $L \in \{96, 384, 768\}$  in this appendix. These detailed results provide a more comprehensive view of model behavior across varying lookback window size.

Table 4: Multivariate long-term forecasting results compared with baseline models. **Bold** indicates the best result, and underlined denotes the second best. The results are reported using input length  $L = 96$  and prediction lengths  $H \in \{96, 192, 336, 720\}$ .

| Models      | Metric | TimePerceiver |              | DeformableTST |              | CARD         |              | CATS         |              | PatchTST     |              | iTransformer |              | S-Mamba      |              | DLinear |       | TimesNet |       | TiDE  |       |
|-------------|--------|---------------|--------------|---------------|--------------|--------------|--------------|--------------|--------------|--------------|--------------|--------------|--------------|--------------|--------------|---------|-------|----------|-------|-------|-------|
|             |        | MSE           | MAE          | MSE           | MAE          | MSE          | MAE          | MSE          | MAE          | MSE          | MAE          | MSE          | MAE          | MSE          | MAE          | MSE     | MAE   | MSE      | MAE   | MSE   | MAE   |
| Weather     | 96     | <b>0.153</b>  | <b>0.202</b> | 0.169         | 0.213        | <u>0.160</u> | 0.208        | 0.161        | <u>0.207</u> | 0.177        | 0.218        | 0.174        | 0.214        | 0.165        | 0.210        | 0.196   | 0.255 | 0.172    | 0.220 | 0.202 | 0.261 |
|             | 192    | <b>0.202</b>  | <b>0.247</b> | 0.216         | 0.255        | <u>0.207</u> | <u>0.250</u> | 0.208        | <u>0.250</u> | 0.225        | 0.259        | 0.221        | 0.254        | 0.214        | 0.252        | 0.237   | 0.296 | 0.219    | 0.261 | 0.242 | 0.298 |
|             | 336    | <b>0.258</b>  | <b>0.288</b> | 0.271         | 0.294        | 0.265        | 0.292        | <u>0.264</u> | <u>0.290</u> | 0.278        | 0.297        | 0.278        | 0.296        | 0.274        | 0.297        | 0.283   | 0.335 | 0.280    | 0.306 | 0.287 | 0.335 |
|             | 720    | <b>0.338</b>  | <b>0.340</b> | 0.347         | 0.344        | 0.346        | 0.346        | <u>0.342</u> | <u>0.341</u> | 0.354        | 0.348        | 0.358        | 0.347        | 0.350        | 0.345        | 0.345   | 0.381 | 0.365    | 0.359 | 0.351 | 0.386 |
|             | Avg    | <b>0.238</b>  | <b>0.269</b> | 0.251         | 0.276        | 0.245        | 0.274        | <u>0.244</u> | <u>0.272</u> | 0.259        | 0.281        | 0.258        | 0.278        | 0.251        | 0.276        | 0.265   | 0.317 | 0.259    | 0.287 | 0.271 | 0.320 |
| Solar       | 96     | <u>0.199</u>  | <u>0.238</u> | <b>0.193</b>  | <b>0.232</b> | 0.230        | 0.281        | 0.216        | 0.247        | 0.234        | 0.286        | 0.203        | 0.237        | 0.205        | 0.244        | 0.290   | 0.378 | 0.250    | 0.292 | 0.312 | 0.399 |
|             | 192    | <u>0.228</u>  | <b>0.259</b> | <b>0.225</b>  | <u>0.261</u> | 0.267        | 0.308        | 0.247        | 0.267        | 0.267        | 0.310        | 0.233        | 0.261        | 0.237        | 0.270        | 0.320   | 0.398 | 0.296    | 0.318 | 0.339 | 0.416 |
|             | 336    | <u>0.247</u>  | <u>0.273</u> | <b>0.239</b>  | <b>0.267</b> | 0.289        | 0.319        | 0.267        | 0.277        | 0.290        | 0.315        | 0.248        | <u>0.273</u> | 0.258        | 0.288        | 0.353   | 0.415 | 0.319    | 0.330 | 0.368 | 0.430 |
|             | 720    | 0.257         | 0.281        | <b>0.238</b>  | <b>0.265</b> | 0.294        | 0.327        | 0.296        | 0.293        | 0.289        | 0.317        | <u>0.249</u> | <u>0.275</u> | 0.260        | 0.288        | 0.356   | 0.413 | 0.338    | 0.337 | 0.370 | 0.425 |
|             | Avg    | <u>0.233</u>  | 0.263        | <b>0.224</b>  | <b>0.256</b> | 0.270        | 0.309        | 0.257        | 0.271        | 0.270        | 0.307        | <u>0.233</u> | <u>0.262</u> | 0.240        | 0.273        | 0.330   | 0.401 | 0.301    | 0.319 | 0.347 | 0.417 |
| Electricity | 96     | <b>0.131</b>  | <b>0.225</b> | 0.158         | 0.255        | 0.155        | 0.246        | 0.149        | 0.237        | 0.181        | 0.270        | 0.148        | 0.240        | <u>0.139</u> | <u>0.235</u> | 0.197   | 0.282 | 0.168    | 0.272 | 0.237 | 0.329 |
|             | 192    | <b>0.150</b>  | <b>0.244</b> | 0.168         | 0.265        | 0.170        | 0.259        | 0.163        | <u>0.250</u> | 0.188        | 0.274        | 0.162        | 0.253        | <u>0.159</u> | 0.255        | 0.196   | 0.285 | 0.184    | 0.289 | 0.236 | 0.330 |
|             | 336    | <b>0.168</b>  | <b>0.263</b> | 0.183         | 0.280        | 0.194        | 0.285        | 0.180        | <u>0.268</u> | 0.204        | 0.293        | 0.178        | 0.269        | <u>0.176</u> | 0.272        | 0.209   | 0.301 | 0.198    | 0.300 | 0.249 | 0.344 |
|             | 720    | <u>0.209</u>  | <u>0.298</u> | 0.223         | 0.313        | 0.229        | 0.316        | 0.219        | <u>0.302</u> | 0.246        | 0.324        | 0.225        | 0.317        | <b>0.204</b> | <b>0.298</b> | 0.245   | 0.333 | 0.220    | 0.320 | 0.284 | 0.373 |
|             | Avg    | <b>0.165</b>  | <b>0.258</b> | 0.183         | 0.278        | 0.187        | 0.277        | 0.178        | <u>0.264</u> | 0.205        | 0.290        | 0.178        | 0.270        | <u>0.170</u> | 0.265        | 0.212   | 0.300 | 0.192    | 0.295 | 0.251 | 0.344 |
| Traffic     | 96     | 0.400         | <u>0.263</u> | 0.418         | 0.271        | 0.448        | 0.300        | 0.421        | 0.270        | 0.462        | 0.295        | <u>0.395</u> | 0.268        | <b>0.382</b> | <b>0.261</b> | 0.650   | 0.396 | 0.593    | 0.321 | 0.805 | 0.493 |
|             | 192    | <u>0.416</u>  | <b>0.265</b> | 0.437         | 0.276        | 0.465        | 0.303        | 0.436        | 0.275        | 0.466        | 0.296        | 0.417        | 0.276        | <b>0.396</b> | <u>0.267</u> | 0.598   | 0.370 | 0.617    | 0.336 | 0.756 | 0.474 |
|             | 336    | <u>0.430</u>  | <b>0.276</b> | 0.449         | 0.290        | 0.477        | 0.306        | 0.453        | 0.284        | 0.482        | 0.304        | 0.433        | <u>0.283</u> | <b>0.417</b> | <b>0.276</b> | 0.605   | 0.373 | 0.629    | 0.336 | 0.762 | 0.477 |
|             | 720    | <u>0.467</u>  | <b>0.297</b> | 0.477         | 0.303        | 0.509        | 0.323        | 0.484        | 0.303        | 0.514        | 0.322        | <u>0.467</u> | 0.302        | <b>0.460</b> | <u>0.300</u> | 0.645   | 0.394 | 0.640    | 0.350 | 0.719 | 0.449 |
|             | Avg    | <u>0.428</u>  | <b>0.275</b> | 0.445         | 0.285        | 0.475        | 0.308        | 0.450        | 0.283        | 0.481        | 0.304        | <u>0.428</u> | 0.282        | <b>0.414</b> | <u>0.276</u> | 0.625   | 0.383 | 0.620    | 0.336 | 0.760 | 0.473 |
| ETTh1       | 96     | <u>0.372</u>  | <b>0.394</b> | 0.373         | 0.396        | 0.398        | 0.405        | <b>0.371</b> | <u>0.395</u> | 0.414        | 0.419        | 0.386        | 0.405        | 0.386        | 0.405        | 0.386   | 0.400 | 0.384    | 0.402 | 0.479 | 0.464 |
|             | 192    | <b>0.422</b>  | <u>0.425</u> | 0.427         | 0.427        | 0.448        | 0.433        | <u>0.426</u> | <b>0.422</b> | 0.460        | 0.445        | 0.441        | 0.436        | 0.443        | 0.437        | 0.437   | 0.432 | 0.436    | 0.429 | 0.525 | 0.492 |
|             | 336    | <u>0.444</u>  | 0.434        | <b>0.437</b>  | <b>0.426</b> | 0.494        | 0.457        | <b>0.437</b> | <u>0.432</u> | 0.501        | 0.466        | 0.487        | 0.458        | 0.489        | 0.468        | 0.481   | 0.459 | 0.491    | 0.469 | 0.565 | 0.515 |
|             | 720    | <b>0.451</b>  | <b>0.453</b> | <u>0.464</u>  | 0.462        | 0.483        | 0.472        | 0.474        | <u>0.461</u> | 0.500        | 0.488        | 0.503        | 0.491        | 0.502        | 0.489        | 0.519   | 0.516 | 0.521    | 0.500 | 0.594 | 0.558 |
|             | Avg    | <b>0.422</b>  | <b>0.427</b> | <u>0.425</u>  | <u>0.428</u> | 0.456        | 0.442        | 0.427        | <u>0.428</u> | 0.469        | 0.454        | 0.454        | 0.447        | 0.455        | 0.450        | 0.456   | 0.452 | 0.458    | 0.450 | 0.541 | 0.507 |
| ETTh2       | 96     | <u>0.285</u>  | <u>0.338</u> | <b>0.281</b>  | <b>0.334</b> | 0.294        | 0.341        | 0.287        | 0.341        | 0.302        | 0.348        | 0.297        | 0.349        | 0.296        | 0.348        | 0.333   | 0.387 | 0.340    | 0.374 | 0.400 | 0.440 |
|             | 192    | 0.365         | <u>0.388</u> | <b>0.353</b>  | <b>0.382</b> | 0.375        | 0.391        | <u>0.361</u> | <u>0.388</u> | 0.388        | 0.400        | 0.380        | 0.400        | 0.376        | 0.396        | 0.477   | 0.476 | 0.402    | 0.414 | 0.528 | 0.509 |
|             | 336    | <u>0.366</u>  | 0.414        | <b>0.341</b>  | <b>0.379</b> | 0.419        | 0.426        | 0.374        | <u>0.403</u> | 0.426        | 0.433        | 0.428        | 0.432        | 0.424        | 0.431        | 0.594   | 0.541 | 0.452    | 0.452 | 0.643 | 0.571 |
|             | 720    | <b>0.404</b>  | 0.440        | <u>0.410</u>  | <b>0.431</b> | 0.420        | 0.438        | 0.412        | <u>0.433</u> | 0.431        | 0.446        | 0.427        | 0.445        | 0.426        | 0.444        | 0.831   | 0.657 | 0.462    | 0.468 | 0.874 | 0.679 |
|             | Avg    | <u>0.355</u>  | 0.395        | <b>0.346</b>  | <b>0.382</b> | 0.378        | 0.399        | 0.359        | <u>0.391</u> | 0.387        | 0.407        | 0.383        | 0.407        | 0.381        | 0.405        | 0.559   | 0.515 | 0.414    | 0.427 | 0.611 | 0.550 |
| ETTm1       | 96     | <b>0.306</b>  | <b>0.347</b> | <u>0.316</u>  | <u>0.358</u> | 0.327        | 0.359        | 0.318        | <b>0.347</b> | 0.329        | 0.367        | 0.334        | 0.368        | 0.333        | 0.368        | 0.345   | 0.372 | 0.338    | 0.375 | 0.364 | 0.387 |
|             | 192    | <b>0.343</b>  | <b>0.369</b> | <u>0.354</u>  | 0.380        | 0.372        | 0.381        | 0.357        | <u>0.377</u> | 0.367        | 0.385        | 0.377        | 0.391        | 0.376        | 0.390        | 0.380   | 0.389 | 0.374    | 0.387 | 0.398 | 0.404 |
|             | 336    | <b>0.371</b>  | <b>0.391</b> | <u>0.379</u>  | 0.405        | 0.403        | <u>0.401</u> | 0.387        | 0.410        | 0.399        | 0.410        | 0.426        | 0.420        | 0.408        | 0.413        | 0.413   | 0.413 | 0.410    | 0.411 | 0.428 | 0.425 |
|             | 720    | <b>0.428</b>  | <b>0.426</b> | <u>0.443</u>  | 0.438        | 0.467        | 0.438        | 0.448        | <u>0.437</u> | 0.454        | 0.439        | 0.491        | 0.459        | 0.475        | 0.448        | 0.474   | 0.453 | 0.478    | 0.450 | 0.487 | 0.461 |
|             | Avg    | <b>0.362</b>  | <b>0.383</b> | <u>0.373</u>  | 0.395        | 0.392        | 0.395        | 0.378        | <u>0.393</u> | 0.387        | 0.400        | 0.407        | 0.410        | 0.398        | 0.405        | 0.403   | 0.407 | 0.400    | 0.406 | 0.419 | 0.419 |
| ETTm2       | 96     | <b>0.170</b>  | <b>0.249</b> | 0.178         | 0.262        | 0.176        | <u>0.259</u> | 0.178        | 0.261        | <u>0.175</u> | <u>0.259</u> | 0.180        | 0.264        | 0.179        | 0.263        | 0.193   | 0.292 | 0.187    | 0.267 | 0.207 | 0.305 |
|             | 192    | <b>0.236</b>  | <b>0.293</b> | 0.243         | <u>0.301</u> | 0.246        | 0.306        | 0.248        | 0.308        | <u>0.241</u> | 0.302        | 0.250        | 0.309        | 0.250        | 0.309        | 0.284   | 0.362 | 0.249    | 0.309 | 0.290 | 0.364 |
|             | 336    | <b>0.298</b>  | <b>0.330</b> | 0.310         | 0.348        | <u>0.302</u> | <u>0.343</u> | 0.304        | <u>0.343</u> | 0.305        | <u>0.343</u> | 0.311        | 0.348        | 0.312        | 0.349        | 0.369   | 0.427 | 0.321    | 0.351 | 0.377 | 0.422 |
|             | 720    | <b>0.399</b>  | <b>0.392</b> | <u>0.400</u>  | <u>0.398</u> | <u>0.400</u> | 0.404        | 0.402        | 0.402        | 0.402        | 0.400        | 0.412        | 0.407        | 0.411        | 0.406        | 0.554   | 0.522 | 0.408    | 0.403 | 0.558 | 0.524 |
|             | Avg    | <b>0.276</b>  | <b>0.316</b> | 0.283         | 0.327        | <u>0.281</u> | 0.328        | 0.283        | 0.329        | <u>0.281</u> | <u>0.326</u> | 0.288        | 0.332        | 0.288        | 0.332        | 0.350   | 0.401 | 0.291    | 0.333 | 0.358 | 0.404 |

Table 5: Multivariate long-term forecasting results compared with baseline models. **Bold** indicates the best result, and underlined denotes the second best. The results are reported using input length  $L = 384$  and prediction lengths  $H \in \{96, 192, 336, 720\}$ .

| Models      | TimePerceiver |              |              | DeformableTST |              | CARD         |              | CATS         |              | PatchTST     |              | iTransformer |              | S-Mamba      |              | DLinear      |              | TimesNet |       | TiDE  |       |
|-------------|---------------|--------------|--------------|---------------|--------------|--------------|--------------|--------------|--------------|--------------|--------------|--------------|--------------|--------------|--------------|--------------|--------------|----------|-------|-------|-------|
| Metric      | MSE           | MAE          |              | MSE           | MAE          | MSE          | MAE          | MSE          | MAE          | MSE          | MAE          | MSE          | MAE          | MSE          | MAE          | MSE          | MAE          | MSE      | MAE   | MSE   | MAE   |
| Weather     | 96            | <b>0.144</b> | <b>0.195</b> | 0.149         | <b>0.198</b> | 0.155        | 0.209        | <b>0.147</b> | 0.199        | 0.150        | 0.201        | 0.160        | 0.210        | 0.157        | 0.208        | 0.172        | 0.232        | 0.161    | 0.216 | 0.176 | 0.228 |
|             | 192           | <b>0.190</b> | 0.243        | 0.192         | <b>0.238</b> | 0.207        | 0.255        | <b>0.191</b> | <b>0.242</b> | 0.194        | 0.244        | 0.203        | 0.251        | 0.203        | 0.250        | 0.215        | 0.272        | 0.234    | 0.278 | 0.219 | 0.263 |
|             | 336           | <b>0.242</b> | <b>0.279</b> | 0.244         | <b>0.278</b> | 0.263        | 0.294        | <b>0.244</b> | 0.280        | <b>0.243</b> | <b>0.279</b> | 0.252        | 0.287        | 0.256        | 0.290        | 0.264        | 0.317        | 0.286    | 0.316 | 0.266 | 0.298 |
|             | 720           | <b>0.315</b> | 0.336        | 0.317         | <b>0.331</b> | 0.355        | 0.352        | <b>0.314</b> | <b>0.331</b> | 0.319        | <b>0.333</b> | 0.325        | 0.339        | 0.322        | 0.336        | 0.324        | 0.364        | 0.373    | 0.368 | 0.333 | 0.345 |
|             | Avg           | <b>0.223</b> | <b>0.263</b> | 0.225         | <b>0.261</b> | 0.245        | 0.277        | <b>0.224</b> | <b>0.263</b> | 0.226        | 0.264        | 0.235        | 0.272        | 0.235        | 0.272        | 0.244        | 0.296        | 0.264    | 0.295 | 0.249 | 0.284 |
| Solar       | 96            | <b>0.163</b> | <b>0.213</b> | 0.173         | 0.241        | 0.175        | 0.243        | <b>0.172</b> | <b>0.216</b> | 0.197        | 0.291        | 0.187        | 0.246        | 0.194        | 0.243        | 0.216        | 0.316        | 0.217    | 0.311 | 0.228 | 0.300 |
|             | 192           | <b>0.176</b> | <b>0.228</b> | <b>0.187</b>  | 0.248        | 0.209        | 0.262        | 0.189        | <b>0.229</b> | 0.214        | 0.319        | 0.209        | 0.269        | 0.221        | 0.271        | 0.244        | 0.334        | 0.273    | 0.338 | 0.259 | 0.345 |
|             | 336           | <b>0.185</b> | <b>0.246</b> | <b>0.193</b>  | 0.260        | 0.209        | 0.272        | 0.197        | <b>0.236</b> | 0.235        | 0.328        | 0.222        | 0.281        | 0.217        | 0.273        | 0.259        | 0.346        | 0.266    | 0.368 | 0.273 | 0.353 |
|             | 720           | <b>0.197</b> | <b>0.244</b> | 0.204         | 0.272        | 0.220        | 0.281        | <b>0.203</b> | <b>0.245</b> | 0.225        | 0.329        | 0.231        | 0.291        | 0.230        | 0.286        | 0.283        | 0.350        | 0.251    | 0.336 | 0.294 | 0.346 |
|             | Avg           | <b>0.182</b> | <b>0.233</b> | <b>0.189</b>  | 0.255        | 0.205        | 0.265        | 0.190        | <b>0.232</b> | 0.218        | 0.317        | 0.212        | 0.272        | 0.216        | 0.268        | 0.251        | 0.337        | 0.252    | 0.338 | 0.264 | 0.336 |
| Electricity | 96            | <b>0.125</b> | <b>0.219</b> | 0.132         | 0.231        | 0.133        | 0.233        | <b>0.128</b> | <b>0.224</b> | 0.133        | 0.232        | 0.140        | 0.240        | 0.134        | 0.230        | 0.151        | 0.250        | 0.192    | 0.300 | 0.161 | 0.266 |
|             | 192           | <b>0.142</b> | <b>0.235</b> | 0.150         | 0.250        | 0.157        | 0.256        | <b>0.147</b> | <b>0.237</b> | 0.148        | 0.246        | 0.158        | 0.258        | 0.154        | 0.250        | 0.165        | 0.263        | 0.202    | 0.306 | 0.169 | 0.273 |
|             | 336           | <b>0.161</b> | <b>0.254</b> | 0.167         | 0.267        | 0.169        | 0.268        | <b>0.162</b> | <b>0.255</b> | 0.169        | 0.265        | 0.175        | 0.275        | 0.174        | 0.271        | 0.180        | 0.280        | 0.262    | 0.350 | 0.181 | 0.284 |
|             | 720           | 0.200        | <b>0.288</b> | 0.203         | 0.299        | 0.200        | 0.292        | <b>0.198</b> | <b>0.286</b> | 0.202        | 0.295        | 0.215        | 0.310        | <b>0.197</b> | 0.292        | 0.215        | 0.313        | 0.257    | 0.349 | 0.210 | 0.308 |
|             | Avg           | <b>0.157</b> | <b>0.249</b> | 0.163         | 0.262        | 0.165        | 0.262        | <b>0.159</b> | <b>0.253</b> | 0.163        | 0.260        | 0.172        | 0.271        | 0.165        | 0.261        | 0.178        | 0.277        | 0.228    | 0.326 | 0.180 | 0.283 |
| Traffic     | 96            | 0.373        | 0.262        | 0.362         | 0.262        | 0.380        | 0.270        | <b>0.358</b> | <b>0.248</b> | 0.385        | 0.277        | 0.393        | 0.298        | <b>0.346</b> | <b>0.250</b> | 0.428        | 0.304        | 0.556    | 0.305 | 0.489 | 0.364 |
|             | 192           | <b>0.383</b> | <b>0.263</b> | 0.385         | 0.268        | 0.398        | 0.277        | <b>0.386</b> | 0.266        | 0.401        | 0.283        | 0.414        | 0.312        | <b>0.355</b> | <b>0.257</b> | 0.437        | 0.308        | 0.557    | 0.304 | 0.493 | 0.370 |
|             | 336           | 0.399        | 0.270        | 0.397         | 0.275        | 0.409        | 0.289        | <b>0.393</b> | <b>0.263</b> | 0.410        | 0.287        | 0.432        | 0.322        | <b>0.363</b> | <b>0.265</b> | 0.448        | 0.314        | 0.590    | 0.312 | 0.512 | 0.383 |
|             | 720           | <b>0.433</b> | <b>0.289</b> | 0.434         | 0.298        | 0.437        | 0.301        | 0.435        | <b>0.295</b> | 0.443        | 0.304        | 0.472        | 0.347        | <b>0.423</b> | <b>0.289</b> | 0.480        | 0.333        | 0.617    | 0.323 | 0.539 | 0.404 |
|             | Avg           | 0.397        | 0.271        | 0.395         | 0.276        | 0.406        | 0.284        | <b>0.393</b> | <b>0.268</b> | 0.410        | 0.288        | 0.428        | 0.320        | <b>0.372</b> | <b>0.265</b> | 0.448        | 0.315        | 0.580    | 0.311 | 0.508 | 0.380 |
| ETTh1       | 96            | <b>0.366</b> | <b>0.393</b> | <b>0.369</b>  | <b>0.396</b> | 0.377        | 0.402        | 0.381        | 0.405        | 0.376        | 0.401        | 0.413        | 0.427        | 0.398        | 0.419        | 0.373        | 0.399        | 0.414    | 0.428 | 0.451 | 0.455 |
|             | 192           | <b>0.394</b> | <b>0.411</b> | 0.410         | <b>0.417</b> | <b>0.404</b> | 0.418        | 0.416        | 0.433        | 0.410        | 0.421        | 0.449        | 0.450        | 0.436        | 0.444        | 0.407        | 0.421        | 0.469    | 0.467 | 0.482 | 0.473 |
|             | 336           | <b>0.413</b> | <b>0.422</b> | <b>0.391</b>  | <b>0.414</b> | 0.428        | 0.435        | 0.435        | 0.440        | 0.434        | 0.439        | 0.455        | 0.458        | 0.448        | 0.455        | 0.524        | 0.445        | 0.502    | 0.480 | 0.501 | 0.486 |
|             | 720           | <b>0.445</b> | <b>0.453</b> | 0.447         | 0.464        | <b>0.437</b> | <b>0.459</b> | 0.451        | 0.460        | 0.451        | 0.471        | 0.528        | 0.521        | 0.508        | 0.508        | 0.479        | 0.501        | 0.645    | 0.542 | 0.510 | 0.509 |
|             | Avg           | <b>0.404</b> | <b>0.420</b> | <b>0.404</b>  | <b>0.423</b> | <b>0.412</b> | 0.429        | 0.421        | 0.435        | 0.418        | 0.433        | 0.461        | 0.464        | 0.445        | 0.457        | 0.424        | 0.442        | 0.508    | 0.479 | 0.486 | 0.481 |
| ETTh2       | 96            | <b>0.272</b> | <b>0.333</b> | <b>0.272</b>  | 0.334        | <b>0.275</b> | 0.336        | 0.283        | 0.346        | <b>0.275</b> | 0.337        | 0.306        | <b>0.326</b> | 0.300        | 0.357        | 0.305        | 0.368        | 0.347    | 0.395 | 0.370 | 0.431 |
|             | 192           | <b>0.333</b> | 0.381        | <b>0.325</b>  | <b>0.369</b> | 0.339        | 0.376        | 0.345        | 0.384        | 0.338        | <b>0.375</b> | 0.366        | 0.402        | 0.367        | 0.399        | 0.399        | 0.428        | 0.403    | 0.430 | 0.441 | 0.474 |
|             | 336           | <b>0.346</b> | 0.399        | <b>0.319</b>  | <b>0.373</b> | 0.360        | 0.397        | 0.372        | 0.406        | 0.352        | <b>0.391</b> | 0.400        | 0.427        | 0.392        | 0.420        | 0.471        | 0.476        | 0.441    | 0.457 | 0.469 | 0.499 |
|             | 720           | <b>0.386</b> | <b>0.431</b> | 0.395         | 0.433        | <b>0.390</b> | <b>0.425</b> | 0.408        | 0.443        | 0.398        | 0.435        | 0.435        | 0.454        | 0.416        | 0.445        | 0.764        | 0.621        | 0.471    | 0.483 | 0.504 | 0.530 |
|             | Avg           | <b>0.334</b> | 0.386        | <b>0.328</b>  | <b>0.377</b> | 0.341        | <b>0.384</b> | 0.352        | 0.395        | 0.341        | 0.385        | 0.377        | 0.412        | 0.369        | 0.405        | 0.485        | 0.473        | 0.416    | 0.441 | 0.446 | 0.484 |
| ETTm1       | 96            | <b>0.283</b> | <b>0.334</b> | 0.292         | 0.344        | 0.295        | 0.346        | <b>0.284</b> | <b>0.339</b> | 0.292        | 0.344        | 0.314        | 0.366        | 0.308        | 0.360        | 0.302        | 0.345        | 0.338    | 0.377 | 0.311 | 0.353 |
|             | 192           | <b>0.321</b> | <b>0.359</b> | 0.335         | 0.371        | 0.339        | 0.371        | <b>0.323</b> | <b>0.363</b> | 0.340        | 0.373        | 0.353        | 0.389        | 0.344        | 0.382        | 0.337        | 0.368        | 0.363    | 0.386 | 0.344 | 0.372 |
|             | 336           | <b>0.352</b> | <b>0.378</b> | 0.365         | 0.392        | 0.373        | 0.392        | <b>0.356</b> | <b>0.384</b> | 0.367        | 0.394        | 0.383        | 0.405        | 0.378        | 0.403        | 0.368        | <b>0.384</b> | 0.389    | 0.405 | 0.378 | 0.391 |
|             | 720           | <b>0.399</b> | <b>0.410</b> | 0.417         | 0.418        | 0.420        | <b>0.414</b> | <b>0.411</b> | 0.421        | 0.422        | 0.427        | 0.437        | 0.435        | 0.439        | 0.441        | 0.422        | 0.418        | 0.514    | 0.465 | 0.433 | 0.422 |
|             | Avg           | <b>0.338</b> | <b>0.370</b> | 0.352         | 0.381        | 0.357        | 0.381        | <b>0.344</b> | <b>0.377</b> | 0.355        | 0.385        | 0.372        | 0.399        | 0.367        | 0.397        | 0.357        | 0.379        | 0.401    | 0.408 | 0.367 | 0.385 |
| ETTm2       | 96            | <b>0.161</b> | 0.257        | 0.170         | 0.257        | <b>0.165</b> | <b>0.256</b> | 0.172        | 0.260        | 0.166        | <b>0.255</b> | 0.179        | 0.271        | 0.181        | 0.269        | <b>0.165</b> | 0.260        | 0.217    | 0.290 | 0.189 | 0.292 |
|             | 192           | <b>0.215</b> | <b>0.285</b> | <b>0.227</b>  | <b>0.295</b> | 0.229        | 0.298        | 0.234        | 0.306        | 0.228        | 0.299        | 0.243        | 0.313        | 0.233        | 0.308        | 0.238        | 0.319        | 0.251    | 0.317 | 0.250 | 0.333 |
|             | 336           | <b>0.273</b> | <b>0.325</b> | 0.278         | <b>0.327</b> | 0.274        | 0.328        | 0.278        | 0.335        | 0.280        | 0.331        | 0.295        | 0.345        | 0.281        | 0.338        | 0.309        | 0.370        | 0.312    | 0.358 | 0.309 | 0.372 |
|             | 720           | <b>0.357</b> | <b>0.375</b> | 0.365         | 0.384        | <b>0.367</b> | <b>0.383</b> | <b>0.363</b> | 0.391        | 0.373        | 0.389        | 0.377        | 0.397        | 0.368        | 0.391        | 0.404        | 0.423        | 0.481    | 0.448 | 0.412 | 0.435 |
|             | Avg           | <b>0.252</b> | <b>0.311</b> | 0.260         | <b>0.316</b> | <b>0.259</b> | <b>0.316</b> | 0.262        | 0.323        | 0.262        | 0.319        | 0.273        | 0.332        | 0.266        | 0.327        | 0.279        | 0.343        | 0.315    | 0.353 | 0.290 | 0.358 |



Table 6: Multivariate long-term forecasting results compared with baseline models. **Bold** indicates the best result, and underlined denotes the second best. The results are reported using input length  $L = 768$  and prediction lengths  $H \in \{96, 192, 336, 720\}$ .

| Models      | TimePerceiver |              |              | DeformableTST |              | CARD         |              | CATS         |              | PatchTST     |              | iTransformer |       | S-Mamba      |              | DLinear      |              | TimesNet |       | TiDe  |       |
|-------------|---------------|--------------|--------------|---------------|--------------|--------------|--------------|--------------|--------------|--------------|--------------|--------------|-------|--------------|--------------|--------------|--------------|----------|-------|-------|-------|
| Metric      | MSE           | MAE          |              | MSE           | MAE          | MSE          | MAE          | MSE          | MAE          | MSE          | MAE          | MSE          | MAE   | MSE          | MAE          | MSE          | MAE          | MSE      | MAE   | MSE   | MAE   |
| Weather     | 96            | <u>0.144</u> | 0.200        | 0.146         | <u>0.198</u> | 0.152        | 0.208        | <b>0.143</b> | <b>0.197</b> | 0.148        | 0.202        | 0.165        | 0.217 | 0.165        | 0.219        | 0.167        | 0.226        | 0.173    | 0.228 | 0.171 | 0.225 |
|             | 192           | <b>0.186</b> | <b>0.237</b> | 0.191         | <u>0.239</u> | 0.227        | 0.269        | <u>0.188</u> | 0.240        | 0.194        | 0.241        | 0.205        | 0.253 | 0.210        | 0.259        | 0.211        | 0.267        | 0.258    | 0.296 | 0.214 | 0.261 |
|             | 336           | <b>0.239</b> | 0.283        | <u>0.241</u>  | <b>0.280</b> | 0.262        | 0.298        | <b>0.239</b> | <b>0.282</b> | 0.243        | <b>0.282</b> | 0.259        | 0.296 | 0.267        | 0.301        | 0.256        | 0.306        | 0.311    | 0.334 | 0.258 | 0.295 |
|             | 720           | 0.316        | 0.337        | <u>0.310</u>  | <u>0.331</u> | 0.362        | 0.356        | <b>0.309</b> | <b>0.333</b> | <u>0.310</u> | <b>0.328</b> | 0.321        | 0.342 | 0.330        | 0.346        | 0.315        | 0.353        | 0.416    | 0.404 | 0.321 | 0.340 |
|             | Avg           | <u>0.221</u> | 0.264        | 0.222         | <b>0.262</b> | 0.251        | 0.283        | <b>0.220</b> | <u>0.263</u> | 0.224        | <u>0.263</u> | 0.238        | 0.277 | 0.243        | 0.281        | 0.237        | 0.288        | 0.290    | 0.316 | 0.241 | 0.280 |
| Solar       | 96            | <b>0.158</b> | <b>0.211</b> | 0.165         | 0.238        | 0.177        | 0.246        | <u>0.163</u> | <u>0.222</u> | 0.191        | 0.273        | 0.174        | 0.242 | 0.174        | 0.238        | 0.190        | 0.273        | 0.219    | 0.279 | 0.197 | 0.272 |
|             | 192           | <b>0.180</b> | <b>0.228</b> | <u>0.184</u>  | 0.254        | 0.210        | 0.268        | 0.193        | <u>0.234</u> | 0.211        | 0.282        | 0.194        | 0.259 | 0.198        | 0.264        | 0.211        | 0.291        | 0.228    | 0.297 | 0.216 | 0.293 |
|             | 336           | <b>0.186</b> | <b>0.225</b> | 0.191         | 0.263        | 0.219        | 0.277        | <u>0.189</u> | <u>0.247</u> | 0.221        | 0.293        | 0.207        | 0.272 | 0.213        | 0.275        | 0.227        | 0.303        | 0.239    | 0.312 | 0.233 | 0.317 |
|             | 720           | <b>0.197</b> | <u>0.253</u> | <u>0.199</u>  | 0.262        | 0.233        | 0.294        | <u>0.199</u> | <b>0.245</b> | 0.235        | 0.297        | 0.217        | 0.279 | 0.217        | 0.277        | 0.234        | 0.316        | 0.238    | 0.313 | 0.237 | 0.320 |
|             | Avg           | <b>0.180</b> | <b>0.229</b> | <u>0.185</u>  | 0.254        | 0.210        | 0.271        | 0.186        | <u>0.237</u> | 0.215        | 0.286        | 0.198        | 0.263 | 0.201        | 0.264        | 0.216        | 0.296        | 0.231    | 0.300 | 0.221 | 0.301 |
| Electricity | 96            | <u>0.128</u> | <u>0.225</u> | 0.132         | 0.234        | 0.133        | 0.230        | <b>0.126</b> | <b>0.222</b> | 0.130        | 0.235        | 0.142        | 0.241 | 0.134        | 0.232        | 0.145        | 0.243        | 0.203    | 0.310 | 0.143 | 0.250 |
|             | 192           | <b>0.147</b> | <b>0.241</b> | <u>0.148</u>  | 0.248        | 0.157        | 0.256        | 0.149        | <u>0.243</u> | 0.153        | 0.249        | 0.160        | 0.258 | 0.157        | 0.253        | 0.159        | 0.257        | 0.205    | 0.313 | 0.154 | 0.258 |
|             | 336           | <b>0.165</b> | <b>0.260</b> | <b>0.165</b>  | 0.266        | 0.181        | 0.283        | 0.171        | <u>0.263</u> | <b>0.168</b> | 0.269        | 0.179        | 0.277 | 0.169        | 0.268        | 0.174        | 0.274        | 0.228    | 0.331 | 0.176 | 0.275 |
|             | 720           | 0.202        | 0.293        | <u>0.197</u>  | 0.296        | 0.207        | 0.303        | <u>0.196</u> | <b>0.287</b> | 0.205        | 0.298        | 0.221        | 0.312 | <b>0.194</b> | <b>0.289</b> | 0.208        | 0.307        | 0.241    | 0.342 | 0.213 | 0.303 |
|             | Avg           | <b>0.160</b> | <u>0.255</u> | <u>0.161</u>  | 0.261        | 0.170        | 0.268        | <u>0.161</u> | <b>0.254</b> | 0.164        | 0.263        | 0.176        | 0.272 | 0.164        | 0.261        | 0.171        | 0.270        | 0.219    | 0.324 | 0.171 | 0.272 |
| Traffic     | 96            | 0.370        | 0.265        | <u>0.355</u>  | 0.261        | 0.369        | 0.267        | 0.357        | <b>0.248</b> | 0.373        | 0.267        | 0.380        | 0.291 | <b>0.342</b> | <u>0.250</u> | 0.400        | 0.287        | 0.565    | 0.303 | 0.451 | 0.344 |
|             | 192           | 0.382        | 0.268        | <u>0.380</u>  | 0.271        | 0.381        | 0.270        | <u>0.379</u> | <b>0.258</b> | 0.384        | 0.269        | 0.400        | 0.306 | <b>0.362</b> | <u>0.262</u> | 0.411        | 0.291        | 0.579    | 0.308 | 0.459 | 0.346 |
|             | 336           | 0.397        | 0.272        | <u>0.393</u>  | 0.281        | 0.402        | 0.283        | <u>0.393</u> | <b>0.265</b> | 0.399        | 0.275        | 0.420        | 0.317 | <b>0.366</b> | <u>0.268</u> | 0.425        | 0.298        | 0.573    | 0.304 | 0.470 | 0.353 |
|             | 720           | 0.436        | <u>0.292</u> | 0.434         | 0.300        | 0.437        | 0.299        | <b>0.426</b> | <b>0.285</b> | 0.439        | 0.295        | 0.466        | 0.344 | <u>0.430</u> | 0.295        | 0.465        | 0.322        | 0.601    | 0.318 | 0.491 | 0.362 |
|             | Avg           | 0.396        | 0.274        | 0.391         | 0.278        | 0.397        | 0.280        | <u>0.389</u> | <b>0.264</b> | 0.399        | 0.277        | 0.417        | 0.315 | <b>0.375</b> | <u>0.269</u> | 0.425        | 0.300        | 0.579    | 0.308 | 0.468 | 0.351 |
| ETTh1       | 96            | <b>0.355</b> | <b>0.390</b> | <u>0.367</u>  | 0.404        | 0.377        | 0.410        | 0.373        | 0.407        | 0.379        | 0.410        | 0.401        | 0.428 | 0.393        | 0.425        | 0.372        | <u>0.401</u> | 0.510    | 0.483 | 0.446 | 0.457 |
|             | 192           | <b>0.390</b> | <b>0.415</b> | <u>0.409</u>  | 0.430        | 0.410        | 0.428        | 0.416        | 0.441        | 0.416        | 0.433        | 0.433        | 0.452 | 0.432        | 0.451        | 0.411        | <u>0.425</u> | 0.537    | 0.505 | 0.483 | 0.478 |
|             | 336           | <b>0.419</b> | <b>0.436</b> | <b>0.406</b>  | <u>0.437</u> | 0.430        | 0.443        | 0.456        | 0.464        | 0.440        | 0.451        | 0.475        | 0.481 | 0.474        | 0.479        | 0.438        | 0.450        | 0.691    | 0.561 | 0.508 | 0.496 |
|             | 720           | <b>0.455</b> | <b>0.477</b> | <u>0.458</u>  | <u>0.481</u> | 0.470        | 0.487        | 0.503        | 0.489        | 0.469        | 0.483        | 0.567        | 0.549 | 0.532        | 0.528        | 0.486        | 0.508        | 0.680    | 0.556 | 0.518 | 0.519 |
|             | Avg           | <b>0.405</b> | <b>0.430</b> | <u>0.410</u>  | <u>0.438</u> | 0.422        | 0.442        | 0.437        | 0.450        | 0.426        | 0.444        | 0.469        | 0.478 | 0.458        | 0.471        | 0.427        | 0.446        | 0.605    | 0.526 | 0.489 | 0.488 |
| ETTTh2      | 96            | 0.278        | <u>0.338</u> | <b>0.269</b>  | <b>0.334</b> | 0.279        | 0.341        | 0.277        | 0.339        | <u>0.275</u> | 0.339        | 0.307        | 0.363 | 0.298        | 0.356        | 0.325        | 0.386        | 0.431    | 0.446 | 0.365 | 0.427 |
|             | 192           | 0.344        | 0.395        | <b>0.325</b>  | <b>0.372</b> | 0.350        | 0.384        | 0.337        | 0.383        | <u>0.336</u> | <u>0.378</u> | 0.441        | 0.442 | 0.370        | 0.406        | 0.432        | 0.450        | 0.444    | 0.471 | 0.436 | 0.471 |
|             | 336           | <u>0.350</u> | 0.409        | <b>0.324</b>  | <b>0.380</b> | 0.367        | 0.403        | 0.370        | 0.407        | 0.357        | <u>0.401</u> | 0.452        | 0.456 | 0.394        | 0.425        | 0.535        | 0.508        | 0.513    | 0.499 | 0.459 | 0.495 |
|             | 720           | <u>0.395</u> | 0.441        | 0.412         | 0.446        | <b>0.392</b> | <b>0.430</b> | 0.435        | 0.468        | 0.397        | <u>0.436</u> | 0.434        | 0.462 | 0.428        | 0.454        | 0.947        | 0.689        | 0.520    | 0.494 | 0.494 | 0.529 |
|             | Avg           | 0.342        | 0.396        | <b>0.333</b>  | <b>0.383</b> | 0.347        | 0.390        | 0.355        | 0.399        | <u>0.341</u> | <u>0.389</u> | 0.409        | 0.431 | 0.373        | 0.410        | 0.560        | 0.508        | 0.477    | 0.483 | 0.439 | 0.480 |
| ETTm1       | 96            | <b>0.283</b> | <b>0.337</b> | 0.291         | 0.347        | 0.296        | 0.343        | <u>0.285</u> | <u>0.340</u> | 0.295        | 0.351        | 0.316        | 0.370 | 0.310        | 0.367        | 0.307        | 0.351        | 0.378    | 0.397 | 0.317 | 0.360 |
|             | 192           | <u>0.324</u> | <b>0.366</b> | 0.325         | 0.372        | 0.339        | 0.371        | <b>0.318</b> | <b>0.368</b> | 0.329        | 0.373        | 0.347        | 0.387 | 0.350        | 0.390        | 0.337        | <u>0.368</u> | 0.414    | 0.415 | 0.344 | 0.374 |
|             | 336           | <b>0.348</b> | <b>0.379</b> | 0.359         | 0.390        | 0.368        | 0.388        | <u>0.353</u> | <u>0.384</u> | 0.364        | 0.395        | 0.388        | 0.412 | 0.377        | 0.406        | 0.364        | <u>0.384</u> | 0.443    | 0.429 | 0.373 | 0.391 |
|             | 720           | <u>0.410</u> | <b>0.409</b> | 0.418         | 0.423        | 0.417        | 0.420        | <b>0.404</b> | 0.415        | 0.420        | 0.432        | 0.460        | 0.456 | 0.430        | 0.440        | 0.413        | <u>0.414</u> | 0.510    | 0.474 | 0.422 | 0.418 |
|             | Avg           | <u>0.342</u> | <b>0.373</b> | 0.348         | 0.383        | 0.355        | 0.381        | <b>0.340</b> | <u>0.377</u> | 0.352        | 0.388        | 0.378        | 0.406 | 0.367        | 0.401        | 0.355        | 0.379        | 0.436    | 0.429 | 0.364 | 0.386 |
| ETTm2       | 96            | 0.166        | 0.257        | 0.169         | 0.258        | <u>0.164</u> | <u>0.255</u> | 0.168        | 0.262        | 0.182        | 0.272        | 0.185        | 0.278 | 0.178        | 0.271        | <b>0.161</b> | <b>0.253</b> | 0.244    | 0.314 | 0.186 | 0.291 |
|             | 192           | <u>0.224</u> | <b>0.293</b> | 0.229         | 0.299        | 0.226        | <u>0.298</u> | 0.230        | 0.307        | 0.247        | 0.314        | 0.239        | 0.317 | 0.235        | 0.311        | <b>0.222</b> | 0.302        | 0.287    | 0.342 | 0.245 | 0.333 |
|             | 336           | <u>0.278</u> | <b>0.327</b> | 0.280         | 0.333        | <b>0.272</b> | <u>0.328</u> | 0.283        | 0.339        | 0.303        | 0.354        | 0.298        | 0.355 | 0.290        | 0.347        | 0.296        | 0.361        | 0.326    | 0.370 | 0.304 | 0.373 |
|             | 720           | <u>0.357</u> | <b>0.384</b> | <b>0.349</b>  | <b>0.384</b> | 0.390        | 0.399        | 0.367        | 0.391        | 0.371        | 0.398        | 0.401        | 0.416 | 0.362        | <u>0.390</u> | 0.400        | 0.425        | 0.450    | 0.442 | 0.392 | 0.430 |
|             | Avg           | <b>0.256</b> | <b>0.315</b> | <u>0.257</u>  | <u>0.319</u> | 0.263        | 0.320        | 0.262        | 0.325        | 0.276        | 0.335        | 0.281        | 0.341 | 0.266        | 0.330        | 0.270        | 0.335        | 0.327    | 0.367 | 0.282 | 0.357 |

## 793 D Full Results of Component Ablation Studies

Table 7: Full performance comparison across different formulations, encoder attention mechanisms, and positional encoding (PE) sharing strategies. **Bold** indicates the best result among all configurations. A lower MSE or MAE indicates a better performance. The first row corresponds to our proposed model. The results are reported using input length  $L = 384$  and prediction lengths  $H \in \{96, 192, 336, 720\}$ .

| Formulation | Encoder Attention        | PE Sharing  |     | ETTh1        |              | ETTm1        |              | Solar        |              | ECL          |              |
|-------------|--------------------------|-------------|-----|--------------|--------------|--------------|--------------|--------------|--------------|--------------|--------------|
|             |                          |             |     | MSE          | MAE          | MSE          | MAE          | MSE          | MAE          | MSE          | MAE          |
| Generalized | Latent Bottleneck        | Sharing     | 96  | <b>0.366</b> | <b>0.393</b> | <b>0.283</b> | <b>0.334</b> | <b>0.163</b> | <b>0.213</b> | <b>0.125</b> | <b>0.219</b> |
|             |                          |             | 192 | <b>0.394</b> | <b>0.411</b> | <b>0.321</b> | 0.359        | <b>0.176</b> | 0.228        | <b>0.142</b> | <b>0.235</b> |
|             |                          |             | 336 | <b>0.413</b> | <b>0.422</b> | 0.352        | <b>0.378</b> | <b>0.185</b> | 0.246        | 0.161        | 0.254        |
|             |                          |             | 720 | <b>0.445</b> | <b>0.453</b> | <b>0.399</b> | <b>0.410</b> | <b>0.197</b> | <b>0.244</b> | <b>0.200</b> | <b>0.288</b> |
|             |                          |             | Avg | <b>0.404</b> | <b>0.420</b> | <b>0.338</b> | <b>0.370</b> | <b>0.182</b> | 0.233        | <b>0.157</b> | <b>0.249</b> |
| Standard    | Latent Bottleneck        | Sharing     | 96  | 0.378        | 0.403        | 0.292        | 0.346        | 0.178        | 0.228        | 0.142        | 0.239        |
|             |                          |             | 192 | 0.403        | 0.418        | 0.343        | 0.372        | 0.192        | 0.239        | 0.155        | 0.252        |
|             |                          |             | 336 | 0.426        | 0.432        | 0.373        | 0.389        | 0.198        | 0.256        | 0.173        | 0.270        |
|             |                          |             | 720 | 0.474        | 0.495        | 0.410        | 0.419        | 0.209        | 0.248        | 0.207        | 0.299        |
|             |                          |             | Avg | 0.420        | 0.437        | 0.355        | 0.382        | 0.194        | 0.243        | 0.169        | 0.265        |
| Generalized | Full Self-Attention      | Sharing     | 96  | 0.381        | 0.403        | 0.289        | 0.337        | 0.174        | 0.215        | 0.128        | 0.224        |
|             |                          |             | 192 | 0.406        | 0.422        | 0.341        | 0.365        | 0.188        | 0.227        | 0.150        | 0.242        |
|             |                          |             | 336 | 0.438        | 0.436        | 0.364        | 0.383        | 0.203        | 0.255        | 0.162        | 0.256        |
|             |                          |             | 720 | 0.473        | 0.475        | 0.417        | 0.416        | 0.204        | 0.251        | 0.204        | 0.292        |
|             |                          |             | Avg | 0.425        | 0.434        | 0.353        | 0.375        | 0.192        | 0.237        | 0.161        | 0.254        |
| Generalized | Decoupled Self-Attention | Sharing     | 96  | 0.385        | 0.406        | 0.318        | 0.360        | 0.173        | 0.220        | 0.126        | 0.221        |
|             |                          |             | 192 | 0.411        | 0.422        | 0.331        | <b>0.358</b> | 0.184        | 0.231        | 0.146        | 0.238        |
|             |                          |             | 336 | 0.432        | 0.434        | 0.366        | 0.383        | 0.195        | <b>0.232</b> | <b>0.160</b> | <b>0.252</b> |
|             |                          |             | 720 | 0.462        | 0.468        | 0.407        | 0.413        | 0.205        | 0.247        | 0.201        | 0.290        |
|             |                          |             | Avg | 0.423        | 0.433        | 0.356        | 0.379        | 0.189        | 0.233        | 0.158        | 0.250        |
| Generalized | Full Self-Attention      | Not Sharing | 96  | 0.378        | 0.398        | 0.288        | 0.341        | 0.174        | 0.215        | 0.128        | 0.220        |
|             |                          |             | 192 | 0.409        | 0.418        | 0.327        | 0.359        | 0.178        | <b>0.222</b> | 0.146        | 0.241        |
|             |                          |             | 336 | 0.439        | 0.441        | <b>0.350</b> | 0.384        | 0.205        | 0.244        | 0.169        | 0.259        |
|             |                          |             | 720 | 0.465        | 0.471        | 0.406        | 0.411        | 0.215        | 0.248        | 0.208        | 0.297        |
|             |                          |             | Avg | 0.423        | 0.432        | 0.342        | 0.374        | 0.193        | <b>0.232</b> | 0.163        | 0.254        |

As shown in Table 7, this section presents the full results of the component-wise ablation study discussed in Section 4.2. While keeping the overall architecture and generalized formulation, we further discuss the impact of encoder attention and query design in more detail.

In the encoder, to simultaneously capture both temporal and channel dependencies, we needed a method that is not only effective but also computationally efficient. We achieved this through a latent compression technique, which conceptually resembles the use of auxiliary memory in prior neural architectures that decouple computation from the input structure [29–33]. Specifically, we apply three layers of self-attention over a compact latent representation that functions as an auxiliary memory containing distilled yet essential information. This approach enables efficient and effective information extraction, and empirically demonstrates strong performance in terms of both efficiency and accuracy.

In the decoder, we previously discussed how sharing positional embeddings facilitates temporal alignment between encoder inputs and decoder queries. In our main design, we decouple the positional information by using separate channel and temporal positional embeddings (CPE and TPE). As shown in Table 8, one variation of this design combines the two into a single unified positional embedding, representing an alternative approach to query construction.

Table 8: Query design performance comparison.

| Query Design |     | Decoupled PE |              | Unified PE |       |
|--------------|-----|--------------|--------------|------------|-------|
| Metric       |     | MSE          | MAE          | MSE        | MAE   |
| ETTh1        | 96  | <b>0.366</b> | <b>0.393</b> | 0.379      | 0.399 |
|              | 192 | <b>0.394</b> | <b>0.411</b> | 0.405      | 0.418 |
|              | 336 | <b>0.413</b> | <b>0.422</b> | 0.427      | 0.433 |
|              | 720 | <b>0.445</b> | <b>0.453</b> | 0.460      | 0.465 |
|              | Avg | <b>0.404</b> | <b>0.420</b> | 0.418      | 0.429 |

## E Discussion

**Comparisons with other baselines.** As shown in Table 9, we here include more comparisons with recently proposed graph-based and SSM-based models that, while not achieving state-of-the-art performance, have attracted attention due to their novel foundations. Specifically, we compare against graph-based models such as SageFormer [34], CrossGNN [35], and MSGNet [36] as well as SSM-based models including S-Mamba [17] and Sor-Mamba [18]. While graph-based models have generally not yet demonstrated consistently strong performance, Mamba-based models have shown promising results on traffic datasets.

Table 9: Performance comparison with more baselines which are Graph-based and SSM-based models. **Bold** indicates the best result. A lower MSE or MAE indicates a better performance. Results are the average performance over four prediction lengths  $H \in \{96, 192, 336, 720\}$  with input length  $L = 96$ . ‘-’ denotes result is not reported in the official publication.

| Models  | TimePerceiver |              | SageFormer |       | CrossGNN |       | MSGNet |       | S-Mamba |       | Sor-Mamba    |              |
|---------|---------------|--------------|------------|-------|----------|-------|--------|-------|---------|-------|--------------|--------------|
| Metric  | MSE           | MAE          | MSE        | MAE   | MSE      | MAE   | MSE    | MAE   | MSE     | MAE   | MSE          | MAE          |
| Weather | <b>0.238</b>  | <b>0.269</b> | 0.247      | 0.273 | 0.247    | 0.289 | 0.249  | 0.278 | 0.251   | 0.276 | 0.256        | 0.277        |
| Solar   | 0.233         | 0.263        | -          | -     | -        | -     | -      | -     | 0.240   | 0.273 | <b>0.230</b> | <b>0.259</b> |
| ECL     | <b>0.165</b>  | <b>0.258</b> | 0.175      | 0.273 | 0.201    | 0.271 | 0.194  | 0.300 | 0.170   | 0.265 | 0.168        | 0.264        |
| Traffic | 0.428         | 0.275        | 0.436      | 0.285 | 0.583    | 0.323 | -      | -     | 0.414   | 0.276 | <b>0.402</b> | <b>0.273</b> |
| ETTh1   | <b>0.422</b>  | <b>0.427</b> | 0.431      | 0.433 | 0.437    | 0.434 | 0.452  | 0.452 | 0.455   | 0.450 | 0.433        | 0.436        |
| ETTh2   | <b>0.355</b>  | <b>0.395</b> | 0.374      | 0.403 | 0.363    | 0.418 | 0.396  | 0.417 | 0.381   | 0.405 | 0.376        | 0.405        |
| ETTm1   | <b>0.362</b>  | <b>0.383</b> | 0.388      | 0.400 | 0.393    | 0.404 | 0.398  | 0.411 | 0.398   | 0.405 | 0.391        | 0.400        |
| ETTm2   | <b>0.276</b>  | <b>0.316</b> | 0.277      | 0.322 | 0.282    | 0.330 | 0.288  | 0.330 | 0.288   | 0.332 | 0.281        | 0.327        |

**Limitations.** While this work presents a flexible and unified framework for time-series forecasting and demonstrates superior performance over recent baselines, it primarily focuses on multivariate forecasting benchmarks with regular time intervals, following common practice in the literature. Given that our framework is capable of modeling arbitrary time segments via latent bottlenecks, we believe it can be extended to irregular or event-based time series, which is an important direction for future work.

**Broader Impacts.** This work presents a new formulation for time series modeling that broadens its applicability beyond traditional forecasting tasks. Unlike conventional methods that predict the future based only on past observations, our approach allows for flexible prediction across different temporal segments, including inferring from future to past or estimating intermediate time points. This makes it applicable to a variety of real-world scenarios, such as reconstructing unobserved data. Therefore, we strongly believe our framework can be applied to diverse domains, such as healthcare, finance, and environmental monitoring, where time series data plays a critical role, and can inspire future research toward unified and generalizable forecasting systems that better reflect the diversity of real-world applications.

**Ethics Considerations.** As our work focuses on core methodological contributions rather than specific applications, we do not foresee immediate ethical concerns.
